1  
2  
3  
4  
5  
6  
7  
8  
9  
10  
11  
12  
13  
14  
15  
16  
17  
18  
19  
20  
21  
22  
23  
24  
25  
26  
27  
28  
29

## ***TLR8* escapes X chromosome inactivation in human monocytes and CD4<sup>+</sup> T cells**

Ali Youness<sup>1</sup>, Claire Cenac<sup>1</sup>, Berenice Faz-López<sup>1</sup>, Solange Grunenwald<sup>2</sup>, Franck J. Barrat<sup>3,4</sup>,  
Julie Chaumeil<sup>5</sup>, José Enrique Mejía<sup>1\*</sup>, and Jean-Charles Guéry<sup>1\*</sup>

<sup>1</sup> Institut toulousain des maladies infectieuses et inflammatoires (INFINITY), Université de  
Toulouse, UMR 1291 INSERM, CNRS, Toulouse, France.

<sup>2</sup> Service d'Endocrinologie, Maladies Métaboliques et Nutrition, Hôpital Larrey, Centre  
Hospitalier Universitaire (CHU) de Toulouse, Toulouse.

<sup>3</sup> HSS Research Institute and David Z. Rosensweig Genomics Research Center, Hospital for  
Special Surgery, New York, NY;

<sup>4</sup> Department of Microbiology and Immunology, Weill Cornell Medical College of Cornell  
University, New York, NY.

<sup>5</sup> Université Paris Cité, Institut Cochin, INSERM, CNRS, F-75014 PARIS, France.

\* Corresponding authors

Email : [jean-charles.guery@inserm.fr](mailto:jean-charles.guery@inserm.fr)

[jose-enrique.mejia@inserm.fr](mailto:jose-enrique.mejia@inserm.fr)

## 30 Abstract

31 Human endosomal Toll-like receptors TLR7 and TLR8 recognize self and non-self  
32 RNA ligands, and are important mediators of innate immunity and autoimmune pathogenesis.  
33 TLR7 and TLR8 are encoded by the adjacent X-linked genes, *TLR7* and *TLR8*. We previously  
34 established that *TLR7* evades X chromosome inactivation in female immune cells, and that  
35 mononuclear blood cells express more TLR7 protein in women than in men. Using RNA  
36 fluorescence *in situ* hybridization, we now show that *TLR8* likewise evades X chromosome  
37 inactivation in CD14<sup>+</sup> monocytes and CD4<sup>+</sup> T lymphocytes, and that cells harboring *TLR7* or  
38 *TLR8* transcript foci are more frequent in women than in men. In parallel, we found *TLR7* and  
39 *TLR8* simultaneous transcription to be disproportionately frequent in female monocytes and T  
40 cells, and disproportionately scarce in the male cells, resulting in a 7-fold difference in  
41 frequency. These transcriptional biases were again observable when comparing the single X of  
42 XY males with the active X of female cells. Among (47,XXY) Klinefelter syndrome males,  
43 both *TLR7* and *TLR8* escape X chromosome inactivation, and co-transcription frequencies on  
44 the active X of monocytes were intermediate overall between those for XY males and XX  
45 females, and encompassed both male- and female-like individual patterns. These findings  
46 indicate that the *TLR7* and *TLR8* genes form a co-regulated gene cluster, which we have called  
47 the X-linked Toll-like receptor locus, with different sex- and sexual karyotype-dependent  
48 modes of transcription. Interestingly, TLR8 protein expression was significantly higher in  
49 female mononuclear blood cells, including all monocyte subsets, than in the male cells. Thus,  
50 co-dependent transcription from the active X chromosome and escape from inactivation could  
51 both contribute to higher TLR8 protein abundance in female cells, which may have implications  
52 for the response to viruses and bacteria, and the risk of developing inflammatory and  
53 autoimmune diseases.

54  
55  
56  
57  
58  
59  
60  
61

## 62 **Highlights**

- 63 ▪ *TLR8*, like *TLR7*, escapes X chromosome inactivation in immune cells from women and  
64 47,XXY Klinefelter syndrome (KS) men.
- 65 ▪ The frequency of cells double-positive for *TLR7* and *TLR8* primary transcripts is 7-fold higher  
66 in women than in men.
- 67 ▪ *TLR7* and *TLR8* form a co-regulated gene cluster on the human X chromosome, with sex-  
68 specific, divergent transcriptional patterns observable in monocytes and CD4<sup>+</sup> T lymphocytes.
- 69 ▪ Co-dependent transcription of the *TLR7* and *TLR8* genes on the active X was observed in  
70 women and KS men, contrasting with mutually exclusive transcription in euploid men.
- 71 ▪ Blood mononuclear cells, including monocyte subsets, expressed higher levels of TLR8  
72 protein in females than in males.

73

74

75

76

## 77 **Introduction**

78 Human Toll-like receptors 7 and 8 (TLR7, TLR8) are essential components of the innate  
79 immune response to microbial pathogens. These paralogue receptors recognize RNA  
80 degradation products from viruses, intracellular bacteria, fungal and protozoan pathogens, and  
81 also endogenous sources (1-11). TLR7 and TLR8, along with receptors for CpG-unmethylated  
82 DNA (TLR9) and double-stranded RNA (TLR3), make up the subfamily of endosomal nucleic  
83 acid-binding TLRs (12). Crystal structures have revealed TLR7 and TLR8 to be dual sensors

84 possessing two ligand-binding sites working in synergy, one for small agonists, namely  
85 guanosine in TLR7 and uridine in TLR8, and a separate site for short single-stranded RNA  
86 molecules: uridine-rich RNA in TLR7, and U- and G-containing RNA in TLR8 (13-15).

87 TLR7 and TLR8 exhibit different expression landscapes among human leukocytes (16,  
88 17). TLR7 is found primarily in plasmacytoid dendritic cells (pDCs), monocytes, and B  
89 lymphocytes, whereas TLR8 is preferentially expressed in monocytes, myeloid dendritic cells,  
90 and neutrophils. Vigorous production of type I interferon (IFN) by pDCs upon TLR7  
91 stimulation is a key component of the antiviral response, whereas TLR7 and TLR8 signaling  
92 leads to the secretion of proinflammatory cytokines in cells of the monocyte/macrophage  
93 lineage. TLR7 engagement, however, is also known to elicit anergy and cell death in CD4<sup>+</sup> T  
94 cells during chronic infection (18, 19), and TLR8 engagement is reported to reverse Foxp3<sup>+</sup>  
95 Treg cell function through inhibition of glucose uptake and glycolysis (20, 21). Accordingly,  
96 ligand sensing by TLR7 or TLR8 initiates a variety of processes across immune cell  
97 populations, as illustrated by single-stranded viral RNA fragments from SARS-CoV-2, which  
98 elicit either an antiviral or a proinflammatory response in pDCs, myeloid dendritic cells and  
99 lymphocytes (22, 23).

100 Human endosomal TLRs have evolved under stringent purifying selection owing to their  
101 non-redundant role in preserving host fitness (24), and only of late have null mutations of the  
102 X-linked genes, *TLR7* and *TLR8* been discovered. During the spread of SARS-CoV-2,  
103 deficiency in type I interferon-dependent antiviral immunity caused by rare loss-of-function or  
104 hypomorphic *TLR7* mutations emerged as a determinant of life-threatening COVID-19 in men  
105 under 60 (25-29), even though TLR7 engagement in pDCs may also promote the macrophage-  
106 induced cytokine storm in COVID-19 patients (23). Excess TLR7 or TLR8 activity, by contrast,  
107 can lead to sterile inflammation and autoimmunity, and is an important contributor to the  
108 pathogenesis of autoimmune syndromes (30, 31). Its role in the development of autoimmunity

109 was established with the aid of murine models, where the expression of two copies of *Tlr7* or  
110 *Tlr8* was sufficient to induce lupus-like manifestations (16, 31-34). Introgression of TLR7  
111 deficiency into genetic backgrounds predisposing to lupus conversely protected the mice  
112 against autoimmunity (35, 36). Remarkably, dendritic cells of TLR8-deficient mice  
113 overexpressed *Tlr7* and were hyperresponsive to TLR7 ligands, and the animals developed  
114 autoimmunity (37, 38). These animal models prefigured the phenotypes for human mutations  
115 that have been described only recently. A missense mutation (p.Tyr264His) increasing TLR7  
116 affinity for guanosine was carried by a female child suffering from severe lupus, and this  
117 dominant gain-of-function variant of *TLR7* was sufficient to cause autoimmunity in both male  
118 and female transgenic mice (39). Another study identified a missense *TLR8* mutation leading  
119 to partial TLR8 deficiency in monozygotic twin boys with severe autoimmune hemolytic  
120 anemia and a TLR7-dependent autoinflammatory phenotype (40). These human and animal  
121 studies call attention to *TLR7* and *TLR8* as bidirectionally dosage-sensitive genes underpinning  
122 a tonic level of immune activity between the extremes of defective antiviral defense and severe  
123 autoimmune pathogenesis.

124 The *TLR7* and *TLR8* genes lie within a narrow, 56-kb interval on the short arm of  
125 chromosome X (**Fig 1A,B**). These paralogue genes arose from an ancestral autosomal gene that  
126 duplicated in the vertebrate line before the divergence of tetrapods from fishes ~400 million  
127 years ago (41, 42). In eutherian mammals, one of the two X chromosomes of female cells is  
128 randomly inactivated during early embryonic development to equalize the dosage of gene  
129 expression between the sexes. An early step of this process is the coating *in cis* of the X  
130 chromosome to undergo inactivation by the long noncoding RNA, XIST (43). In men with  
131 Klinefelter syndrome, who carry an aneuploid karyotype encompassing one or more  
132 supernumerary X chromosomes, all but one X are similarly inactivated (44). Around 15% to  
133 23% of human X-linked genes escape X chromosome inactivation (XCI) to a variable extent.

134 Some of these genes escape XCI in a constitutive manner, whereas a majority are defined as  
135 facultative escapees as they evade XCI in certain cells, in some tissues or in some individuals  
136 (45-47). We previously demonstrated that the *TLR7* gene can escape XCI and is therefore  
137 transcribed in bi-allelic fashion in a fraction of female immune cells in all individuals tested  
138 (48, 49) but also in immune cells from 47,XXY Klinefelter syndrome (KS) males (48).  
139 Interestingly, KS men have an equivalent risk to women to develop relatively rare immune  
140 disorders such as systemic lupus erythematosus (SLE) (50), Sjogren's syndrome (51) or  
141 Systemic Sclerosis (SSc) (52), suggesting a dominant role of X-linked genetic effects over sex  
142 hormones in autoimmune disease susceptibility. Whether *TLR8* also evades XCI, however, has  
143 not yet been explored. The close proximity between the two genes, and the homology and  
144 similarity of function between the encoded receptors, warranted investigating whether *TLR8*,  
145 mirroring *TLR7*, could be transcribed on the inactive X chromosome (Xi) of the immune cells  
146 of women and Klinefelter syndrome men.

147 We have studied here CD14<sup>+</sup> monocytes and CD4<sup>+</sup> T lymphocytes, where both TLR7  
148 and TLR8 are expressed (18, 53-55), using RNA fluorescence *in situ* hybridization (RNA-  
149 FISH) to visualize on a single-cell basis the primary transcripts of *TLR7* and *TLR8* relative to  
150 X chromosome territories. We provide evidence that *TLR8*, like *TLR7*, escapes XCI in CD4<sup>+</sup> T  
151 cells and monocytes. In addition, we have gathered evidence for co-dependent transcription of  
152 the *TLR7* and *TLR8* genes on the active X chromosome (Xa) of the cells from women and KS  
153 men, in a comparison with euploid men (46,XY). Importantly, TLR8 protein expression was  
154 found to be up-regulated in female immune cells, including monocytes, suggesting that both  
155 XCI escape and co-dependent transcription could enhance TLR8 protein abundance in females.

156

157

158

## 159 **Materials and methods**

### 160 **Donors and ethical compliance**

161 This study complied with the ethical principles of the Declaration of Helsinki, and with  
162 applicable French regulations. Peripheral blood mononuclear cells (PBMCs) of anonymous,  
163 healthy blood donors at the Toulouse blood transfusion center (Etablissement Français du Sang)  
164 were from an in-house biobank approved by the competent ethics board (Comité de Protection  
165 des Personnes Sud-Ouest et Outre-Mer II, Toulouse) under reference 2-15-36. Klinefelter  
166 syndrome males presented with a 47,XXY karyotype, and were aged 16 to 44 at the time of  
167 sample collection. These patients were enrolled at the Toulouse University Hospital, and their  
168 study was approved by the aforementioned ethics board under reference 1-16-28. Written  
169 consent was obtained from each patient or, for child participants, from the legal guardian.

### 170 **Isolation of CD14<sup>+</sup> monocytes and CD4<sup>+</sup> T lymphocytes**

171 Upon thawing, PBMCs from healthy (female n=6; males n= 7) or Klinefelter syndrome  
172 donors (n=5) were cultured overnight in RPMI 1640 medium supplemented with 2 mM L-  
173 glutamine, 0.5 mM sodium pyruvate, 5 mM HEPES, and non-essential amino acids (all from  
174 Life Technologies); 100 U/ml penicillin and 100 µg/ml streptomycin (BioWhittaker); 5%  
175 human AB serum (Gemini Bio-Products); and, for T-cell work, 10 ng/ml human recombinant  
176 IL-2. Classical CD14<sup>+</sup> monocytes and CD4<sup>+</sup> T cells were respectively isolated with EasySep  
177 Human CD14 Positive Selection and Human CD4 Negative Selection kits from STEMCELL  
178 Technologies. Monocytes were cultured in 96-well polypropylene plates to avoid non-specific  
179 activation arising from adhesion to polystyrene. Naive CD4<sup>+</sup> T cells were seeded into 24-well  
180 plates (10<sup>6</sup> cells/well), and stimulated for three days in the presence of 10 ng/ml recombinant

181 human IL-2 and 12.5  $\mu$ l/ml ImmunoCult Human CD3/CD28 T Cell Activator (STEMCELL  
182 Technologies).

### 183 **Flow cytometry**

184 Human immune cells were stained with fluorescent mouse monoclonal antibody (mAb)  
185 conjugates against specific surface markers to study CD4<sup>+</sup> T cell activation: PE-Cy5 anti-human  
186 CD69, clone NF50; and BV421 anti-human CD25, clone M-A251 (both from from BD  
187 Biosciences). Flow cytometry analysis was performed on a BD Biosciences LSR II flow  
188 cytometer or FACSAria II cell sorter, and the data were processed with the FlowJo software  
189 (FlowJo LLC).

190 For intracellular TLR8 staining, freshly thawed PBMCs ( $5 \times 10^6$  cells/ml) from age-  
191 matched male and female healthy subjects from our in-house biobank were surfaced stained  
192 with PE-Vio615 conjugated Lin-specific mAb (anti-CD3, clone BW264/56; anti-CD19, clone  
193 LT19; and anti-CD56, clone REA196; all from Miltenyi Biotec), anti-CD14-PB (clone  
194 REA599, Miltenyi Biotec) and anti-CD16-AF700 (clone 5C3, BD Biosciences). Cells were  
195 then fixed and intracellularly stained using fixation and permeabilization buffers (#00-5123-43  
196 and #00-8333-56, from eBioscience) with anti-TLR8-PE and anti-TLR8-APC mAb (clone  
197 S16018A, BioLegend). Flow cytometry analysis was performed on a BD Biosciences Fortessa  
198 instrument, and monocyte subsets defined as the Lin<sup>-</sup> CD14<sup>+</sup>CD16<sup>-</sup> (classical monocyte),  
199 CD14<sup>+</sup>CD16<sup>+</sup> (intermediate monocyte), and CD14<sup>-</sup>CD16<sup>+</sup> (non-classical monocyte). Data were  
200 processed with the FlowJo 10.9 software.

### 201 **Quantification of TLR8 protein expression by Western blotting**

202 PBMCs were thawed and cultured at 37°C for 2 hours before counting, cell lysate  
203 preparation, and western blotting as below. Cell lysates were prepared in Laemmli sample  
204 buffer (Invitrogen), sonicated, and total protein quantified by a bicinchoninic acid protein assay



205 (Pierce). Samples were heated for 10 minutes at 70°C in the presence of a reducing agent  
206 (Invitrogen). Protein (20–25 µg per lane) were fractionated by SDS-PAGE on precast 4%–15%  
207 gradient Stainfree gels (Bio-Rad), and transferred to Amersham Hybond 0.45-µm PVDF  
208 membranes (GE Healthcare). The membranes were blocked with 5% skim milk, 0.1% Tween-  
209 20 in PBS, probed overnight with the anti-N-terminus (LRR1)-specific anti-human TLR8 mAb  
210 (rabbit monoclonal IgG, clone D3Z6J #11886, Cell Signaling Technology), and finally  
211 incubated with suitable peroxidase-conjugated secondary antibodies (anti-rabbit IgG, #7074,  
212 Cell Signaling Technology). Chemiluminescent detection was carried out with Amersham ECL  
213 Prime reagent (GE Healthcare), and densitometric analysis performed with the Image Lab 5.0  
214 software (Bio-Rad). TLR8 protein quantification was performed as described (56). The  
215 densitometric signals of the full-length TLR8 120-kDa forms were normalized to total protein  
216 and then to an internal standard PBMC lysate that was loaded in each gel for inter-gel data  
217 normalization as described (56).

## 218 **RNA FISH Probes**

219 Probes for RNA FISH were prepared by PCR amplification of human genomic DNA  
220 fragments using the primer sets in **S1 Table**, targeting exon 1 of *XIST* (MIM \*314670), and  
221 both exon and intron regions of *TLR7* (Xp22.2; MIM \*300365), *TLR8* (Xp22.2; MIM \*300366),  
222 *CFP* (Xp11.23; MIM \*300383), *MSN* (Xq12; MIM \*309845) and *PGK1* (Xq21.1; MIM  
223 \*311800). The *XIST* and *TLR7* probes have been described previously (48). To exclude  
224 repetitive DNA from the PCR amplicons, genomic sequences were filtered *in silico* with the  
225 RepeatMasker tool (57) prior to primer design. Probes were fluorescently labeled using the  
226 Vysis Nick Translation kit (Abbott) according to the manufacturer's instructions, and any of  
227 the following dUTP conjugates: aminoallyl-dUTP-ATTO-655, aminoallyl-dUTP-ATTO-550,  
228 or aminoallyl-dUTP-XX-ATTO-488 (all from Jena Bioscience). The Xa marker genes, *CFP*,

229 *MSN* and *PGKI*, were identified as non-escape genes in the scientific literature (47, 58),  
230 supported by additional molecular genetics information from the OMIM database at  
231 <https://omim.org/>, and monocyte expression data from the EBI-EMBL Expression Atlas at  
232 <https://www.ebi.ac.uk/gxa/home>.

### 233 **RNA FISH**

234 RNA FISH was performed as described in our earlier reports (48, 59). Briefly, spreads  
235 of monocytes or T lymphocytes on poly-L-lysine-coated coverslips were fixed for 10 min with  
236 3% paraformaldehyde at room temperature, and permeabilized for 7 min in ice-cold  
237 cytoskeletal buffer containing 0.5% Triton X-100 and 2 mM vanadyl-ribonucleoside complex  
238 (New England Biolabs). The cells were dehydrated through successive ethanol baths, air-dried  
239 briefly, and incubated with the labeled probes overnight at 42°C. The coverslips were rinsed  
240 twice with 50% formamide in 2× SSC (saline sodium citrate) and thrice with 2× SSC alone,  
241 and nuclei were counterstained with DAPI in phosphate buffered saline. The coverslips were  
242 slide-mounted using Dako fluorescence mounting medium before microscopy on a Leica TCS  
243 SP8 or Zeiss LSM710 microscope using a 63× oil immersion objective. Image data were  
244 processed with the Fiji software (<https://fiji.sc/>).

### 245 **Cell scoring**

246 In RNA FISH experiments, individual cells were scored as positive or negative for the  
247 gene of interest depending on the detection or non-detection of primary transcript foci under  
248 microscopic examination. To quantitate the escape from XCI for *TLR7* or *TLR8*, we counted  
249 the cells displaying either bi-allelic transcriptional foci or a single signal on the Xi, and  
250 expressed the percentage of escape cells with reference to the number total of cells positive for  
251 the gene under consideration. In estimating the overall frequencies of *TLR7*, *TLR8*, and joint  
252 *TLR7* and *TLR8* transcriptional foci, cells were scored by two alternative approaches: either (i)

253 in random microscopic fields, by considering all cells regardless of signals from the Xa marker  
254 probe, or (ii) by including only those cells marked by the Xa probe.

## 255 **Statistical analysis**

256 For *TLR7* and *TLR8* considered together, cell counts were cross-classified on a per-  
257 donor basis as a  $2 \times 2$  contingency table with *TLR7* and *TLR8* signals as nominal variables with  
258 positive or negative outcomes as above. Statistical analysis was then performed in the R  
259 computing environment (60). From each  $2 \times 2$  table classifying  $N$  cells total,

|                          |                          |                          |
|--------------------------|--------------------------|--------------------------|
|                          | <i>TLR7</i> <sup>+</sup> | <i>TLR7</i> <sup>-</sup> |
| <i>TLR8</i> <sup>+</sup> | <i>a</i>                 | <i>b</i>                 |
| <i>TLR8</i> <sup>-</sup> | <i>c</i>                 | <i>d</i>                 |

260

261 we derived descriptive statistics, i.e., the percentage of scored cells in a stratum of  
262 interest, and also a measure of association between *TLR7* and *TLR8* transcriptional signals,  
263 namely Yule's Q coefficient of association in  $2 \times 2$  tables (61) as given by equation 1.

$$264 \quad Q = \frac{ad - bc}{ad + bc} \quad (1)$$

265 In parallel, we considered the ratio of the observed frequency of *TLR7*<sup>+</sup> *TLR8*<sup>+</sup> cells to  
266 the frequency expected under the null hypothesis of independent transcription of the two genes.  
267 We computed this *obs/exp* ratio according to equations 2 and 3, where the probability  $p_{7.8}$  of  
268 observing transcriptional foci for *TLR7* and *TLR8* together is given, under independence, by the  
269 product of the respective probabilities of observing *TLR7* and *TLR8* signals.

$$270 \quad p_{7.8} = p_7 p_8 = \frac{a + c}{N} \cdot \frac{a + b}{N} \quad (2)$$

$$271 \quad \frac{obs}{exp} = \frac{a}{N p_{7.8}} = \frac{a N}{(a + c)(a + b)} \quad (3)$$

272 We summarized the RNA FISH data for a given group by a statistical procedure built  
273 around R library *gmeta* (62), which performs meta-analysis based on the mathematics of

274 confidence distributions (CDs) (63). We generated a CD for each statistic under consideration  
275 and for each individual, and fed the individual CDs together to the *gmeta* function for  
276 summarization under a random effects model. CDs for a proportion (such as percent cells  
277 evading XCI, or positive for both *TLR7* and *TLR8* transcripts) were computed by a binomial  
278 approach; CDs for the analytical statistics, Yule's Q and the *obs/exp* ratio, were estimated non-  
279 parametrically by bootstrap resampling with 10000 or 50000 replications. The software  
280 computed a point estimate and 95% CI from each individual CD, and pooled the individual CDs  
281 into a summary CD to derive a group's meta-analytical mean and its 95% CI.

282 To test for independence in 3×2 tables encompassing sparse cells (**S5 Data**), we  
283 performed  $\chi^2$  tests in R by a Monte Carlo procedure with  $10^6$  replications. When carrying out  
284 between-groups comparisons, e.g., males versus females, we computed a p-value to test the  
285 difference between the group summaries for the statistic under consideration. For this, we  
286 determined the probability for the group-A meta-analytical mean according to the CD for group  
287 B, and the probability for the group-B meta-analytical mean according to the CD for group A;  
288 we took the greater of the two one-tailed p-values, and multiplied it ×2 to approximate a two-  
289 tailed hypothesis test. We computed a similar, two-tailed CD-based p-value to test whether a  
290 group's summary for a measure of association (Yule's Q, or the *obs/exp* ratio) diverged from  
291 the null value denoting independence, by performing a single comparison between the  
292 corresponding null value ( $Q = 0$ , or *obs/exp* = 1) and the group's summary CD for this statistic.  
293 Our R scripts performing two- and three-group meta-analytical summarization, hypothesis  
294 tests, and plotting are available from the Zenodo repository under digital object identifiers  
295 (DOIs) <https://doi.org/10.5281/zenodo.6580369> and <https://doi.org/10.5281/zenodo.6580378>.  
296 We performed the Pearson correlation analyses in **Fig S4** with GraphPad Prism 7.0a from  
297 GraphPad Software.

## 298 **Hi-C dataset analysis**

299 We used the Juicebox software (64), including the Contact Domains and Peaks calling  
300 tools, at <http://www.aidenlab.org/juicebox/> to access and visualize the following chromatin  
301 conformation datasets: (i) data for human female lymphoblastoid cell line GM12878 from Rao  
302 and coll. (65), Gene Expression Omnibus (GEO) accession GSE63525; (ii) data for male human  
303 monocytic cell line THP-1 from Phanstiel and coll. (66), Sequence Read Archive (SRA)  
304 accession PRJNA385337; and (iii) data for non-activated, human primary CD3<sup>+</sup> T cells from  
305 Zhang and coll. (67), GEO accession GSE104579.

306

307

## 308 **Results**

### 309 **3D conformation of the *TLR7-TLR8* region on the X chromosome**

310 We first investigated chromatin conformation over the *TLR7-TLR8* region of  
311 chromosome X by leveraging available chromosome conformation capture (Hi-C) datasets (64,  
312 68). Data from the GM12878 human transformed lymphoblastoid female cell line allowed  
313 allelic discrimination of the conformations of the X<sub>a</sub>, of maternal origin in this line, and the  
314 paternal X<sub>i</sub> (65). The overall conformation of X chromosomes confirmed the erosion of  
315 topologically associating domain (TAD) structures on the X<sub>i</sub>, substituted as expected by two  
316 mega-domains (data not shown), but no major conformational differences were observed at  
317 5kb-resolution between the X<sub>a</sub> and the X<sub>i</sub> over the *TLR7-TLR8* region, confirming that escape  
318 regions retain the typical TAD topology (69) (**Fig 1C and Fig S1**). This suggested that global  
319 non-allelic Hi-C analyses of female X chromosomes can be informative about the typical  
320 conformation of the *TLR7-TLR8* region in both the X<sub>a</sub> and X<sub>i</sub>, enabling a comparison with the  
321 single X chromosome of male cells.

322 High 1kb-resolution, non-allelic Hi-C data from GM12878 cells (65) revealed that *TLR7*  
323 and *TLR8* are located in the same domain of interactions (**Fig 1D**). However, on a close look at  
324 this region, it is striking that the *TLR7* promoter makes a strong interaction with the adjacent  
325 *PRPS2* gene, denoted by a characteristic loop signal (**Fig 1D**, dark blue circle), whereas *TLR8*  
326 seems to form a sub-domain of its own (**Fig 1D**, yellow triangle). Similar conformations were  
327 found in male monocytes (66) and T cells (67) (**Fig 1E,F**). These data on the 3D conformation  
328 of the *TLR7-TLR8* genomic region suggested different patterns of transcriptional regulation for  
329 *TLR7*, on one hand, and for *TLR8*, on the other, and prompted us to examine the expression of  
330 primary transcripts from either gene using RNA FISH on immune cell types where both  
331 receptors were known to be co-expressed.

### 332 ***TLR7* and *TLR8* evade X chromosome inactivation in female monocytes and CD4<sup>+</sup> T cells**

333 We used RNA FISH probes to detect both *TLR7* and *TLR8* primary transcripts on the  
334 Xa and Xi of CD14<sup>+</sup> monocytes and CD4<sup>+</sup> T lymphocytes from women. To discriminate the  
335 Xa and Xi chromosomal origins of *TLR7* or *TLR8* primary transcripts, early RNA FISH  
336 experiments involved a previously validated probe for the long non-coding RNA XIST  
337 (reference (48), and **Table S1**), but this probe failed to paint the Xi territory in female  
338 monocytes (not shown). Similar occurrences of XIST non-detection have been noted by others  
339 with regard to resting B and T lymphocytes (70-72). Our alternative strategy was to differentiate  
340 instead the Xa of female cells. For this, we searched the scientific literature and relevant  
341 databases for X-linked genes subject to XCI that were well-expressed in monocytes. We  
342 developed RNA FISH probes for three such genes, *MSN*, *PGK1* and *CFP* (**Table S1**),  
343 respectively encoding moesin, phosphoglycerate kinase 1, and complement factor properdin.  
344 Preliminary hybridizations with each probe separately confirmed widespread but strictly mono-  
345 allelic transcription of these genes in female human monocytes (**Fig S2A,B**), and we used the

346 pooled probes as a positive marker of the Xa in subsequent RNA FISH experiments. A fraction  
347 of female monocytes exhibited two transcriptional foci for *TLR7* (**Fig 2A**) or *TLR8* (**Fig 2C**),  
348 denoting bi-allelic expression of both genes. The frequency of nuclei with a positive signal for  
349 the Xa probes was 35% in average (Fig S2C), whereas the frequency of nuclei positive for  
350 either *TLR7* or *TLR8* primary transcripts was >40% in monocytes (Fig S2D). The percentages  
351 of monocyte nuclei with biallelic expression of *TLR7* or *TLR8* among total positive cells for  
352 either *TLR7* or *TLR8* signals were 10% (95% CI: 4%-16%) and 17% (95% CI: 8%-27%),  
353 respectively. Additionally, we ascribed transcription to the Xi in those cells where a single *TLR7*  
354 or *TLR8* transcriptional focus was observed separate from a patent Xa as detected by the Xa  
355 probe (**Fig 2B** and **2D**). By these criteria, we observed escape from XCI for *TLR7*, as expected,  
356 but also for *TLR8*, in all the donors of our female study group (n = 6; **S1A Data**). The frequency  
357 of *TLR7* transcription on the Xi varied donor to donor between 5% and 32% of cells, with a  
358 group mean of 13% (**Fig 2E**). For *TLR8*, transcription on the Xi concerned 10% to 34% of cells,  
359 with a group mean of 17% (**Fig 2F**).

360 Because *TLR7* and *TLR8* are also expressed in human CD4<sup>+</sup> T cells, we investigated  
361 whether our findings on XCI escape in CD14<sup>+</sup> monocytes could be extended to this lymphocyte  
362 class. For this, naive CD4<sup>+</sup> T lymphocytes were stimulated with IL-2, and then activated  
363 through CD3 and CD28 (**Fig S3B**). We verified activation on the third day using flow cytometry  
364 analysis for CD25 and CD69 levels (**Fig S3C**). As described earlier for monocytes, we  
365 concluded to XCI escape in CD4<sup>+</sup> T cells from women based on the presence of *TLR7* (**Fig**  
366 **S3D**) or *TLR8* (**Fig S3E**) transcripts on both X chromosomes of a cell or, alternatively, on  
367 identifying a single transcriptional signal on the Xi (not shown). *TLR7* evaded XCI in 5% to  
368 11% of T cells, with a group mean of 8% (**Fig 2G** and **S1 Data**). For *TLR8*, the frequency of  
369 escape cells varied over a 4% to 20% range, with a group mean of 8% (**Fig 2H** and **S1 Data**).  
370 On average, XCI escape for these genes was decreased 2- to 3-fold in T cells relative to

371 monocytes. By contrast with monocytes, the XIST hybridization signal characteristic of the Xi  
372 could be visualized by RNA FISH in CD4<sup>+</sup> T cells three days after stimulation through CD3  
373 and CD28 (72). We were thus able to detect *TLR7* and *TLR8* transcripts just next to the inactive  
374 Xi territory covered with XIST RNA, further confirming the XCI escape of the two genes (**Fig**  
375 **2I,J**). Intra-individual levels of XCI escape for *TLR7* and *TLR8* were not significantly correlated  
376 in monocytes (Pearson correlation coefficient  $r = -0.42$ ;  $p = 0.40$ ; **Fig S4A**) nor in CD4 T cells  
377 ( $r = -0.06$ ;  $p = 0.92$ ; **Fig S4C**).

### 378 ***TLR7* and *TLR8* evade XCI in monocytes from 47,XXY KS males**

379 In a previous study, we established *TLR7* escape from XCI in monocytes from four  
380 47,XXY men with Klinefelter syndrome (KS) (48). We have studied here five further KS men  
381 by RNA FISH. As with female monocytes, we were able to establish XCI escape in all the  
382 individuals of this study group based on transcriptional *TLR8* or *TLR7* foci present on both X  
383 chromosomes (**Fig 3A**, top and bottom right), or on a single signal ascribable to the Xi (**Fig 3A**,  
384 top and bottom left). *TLR7* evaded XCI in 10% to 17% of KS male monocytes (a narrower  
385 range than in women), with a group mean of 13% (**Fig 3B** and **S1 Data**). For *TLR8*, the  
386 frequency of escape cells varied over an unexpectedly wide range, 8%–49%, with a group mean  
387 of 23% (**Fig 3C**). As in females, intra-individual levels of *TLR7* and *TLR8* escape were not  
388 correlated ( $r = -0.03$ ;  $p = 0.96$ ; **Fig S4B**).

### 389 **The frequencies of *TLR7* and *TLR8* transcriptional foci are sex-biased**

390 Regardless of the Xa or Xi chromosome of origin, the proportion of monocytes that  
391 exhibited *TLR7* or *TLR8* transcripts exhibited wide inter-individual variation, and was higher  
392 overall in the women group ( $n = 6$ ) than among euploid men ( $n = 7$ ). There were substantial  
393 women-versus-men differences in regard to *TLR7* (**Fig S5A**), with 31% positive cells in women  
394 versus only 17% in euploid men, and 18% for men with KS ( $p < 0.0001$ ). This represents a



395 difference between groups dependent on sex, not on the number of X chromosomes. For *TLR8*,  
396 by contrast, between-groups differences were modest (**Fig S5B**), with a female group mean of  
397 30% versus 24% for XY males, and 31% for XXY KS males (n = 5). For women and XY men,  
398 intra-group variation in the frequency of *TLR8*<sup>+</sup> cells was distinctly wider than the difference  
399 of means between the two groups (**Fig S5B**).

400 We next determined transcript detection frequencies on the Xa specifically, by  
401 considering only those cells positive for the Xa marker probe, and the *TLR7* or *TLR8* foci co-  
402 localizing with the Xa signal. Here again, we observed a clear difference between women and  
403 XY men, with group means of 48% and 33% of *TLR7* positive cells, respectively (p < 0.0001)  
404 (**Fig S5C**). With regard to *TLR8* transcripts, the greatest contrast occurred between the groups  
405 of XY and XXY KS men, who exhibited 45% and 61% of positive monocytes, respectively  
406 (p < 0.0001), with the women's group at an intermediate value of 54% (**Fig S5D**).

407 The analysis for *TLR7* and *TLR8* transcripts in CD4<sup>+</sup> T cells, circumscribed to women  
408 and XY men, showed a sex bias in the same direction as in monocytes (**Fig S6A and S6B, S6**  
409 **data**). The women's group mean frequency of *TLR7*-positive cells was 19% versus 15% for  
410 XY men. For *TLR8*, the divergence was more marked with 31% of positive cells in women  
411 versus 20% in XY men (p < 0.0001). These observations on monocytes and T cells dovetail  
412 with our previous observation that, on average, women's mononuclear blood cells express more  
413 *TLR7* protein than the cells from normal men (48). The female bias was also clearly visible in  
414 the parallel RNA FISH analysis of the transcripts from the Xa specifically (**Fig S6C and S6D**),  
415 with group means of 48% in women versus 30% in XY men for *TLR7*, and 63% in women  
416 versus 39% in XY men for *TLR8*. These sex-dependent divergences were significant for both  
417 genes at the p < 0.0001 level.

418 Overall, the higher counts of *TLR7*- and *TLR8*-positive cells in monocytes and T cells  
419 from women relative to the male cells is likely to arise not only from the contribution of escape

420 transcripts of the Xi alleles but also from greater transcriptional frequencies on the Xa in  
421 women. This strongly suggests that the single X chromosome of XY men and the Xa of women  
422 are functionally non-equivalent as regards the X-linked TLR loci. These observations prompted  
423 us to expand our RNA FISH study of *TLR7* and *TLR8* together to quantify the suggested sex  
424 bias.

#### 425 **The combined transcription profile of *TLR7* and *TLR8* is sex-biased in monocytes**

426 Hybridizations combining the *TLR7* and *TLR8* probes hinted at a co-transcriptional sex  
427 bias in monocytes, as individual cells from XY men were positive for either *TLR7* (**Fig 4A**) or  
428 *TLR8* RNA signals alone (**Fig 4B**), but only rarely for both genes at the same time (**Fig 4C**).  
429 By contrast, co-occurring *TLR7* and *TLR8* signals were readily observable in women's  
430 monocytes, where signals from *TLR7*, *TLR8* or both genes occurred in a variety of combinations  
431 reflecting the presence of two potential source X chromosomes, Xa and Xi (**Fig 4D–G**).  
432 Monocytes from XXY KS males exhibited RNA FISH patterns similar to those of the female  
433 cells (**Fig 4G**). In XY men, 95% of signal-positive monocytes, where the two genes are  
434 necessarily in *cis*, exhibited transcripts from either *TLR7* (**Fig 4A,G**) or *TLR8* alone (**Fig 4B,G**),  
435 and only a consistently small minority (<2% of all cells) transcribed both genes at the same  
436 time (**Fig 4C,G** and **Fig 5A**). Among women's monocytes, *TLR7*<sup>+</sup> *TLR8*<sup>+</sup> cell numbers reached  
437 14% on average, a seven-fold increase relative to XY men (**Fig 4D-G** and **Fig 5A**;  $p < 0.0001$ ).  
438 Monocytes from XXY KS men exhibited an intermediate group mean (9% of *TLR7*<sup>+</sup> *TLR8*<sup>+</sup>  
439 cells **Fig 4G** and **Fig 5A**).

440 This contrast between women and XY men persisted when we next compared the single  
441 X of men with the Xa of women (**Fig 5B**). The frequency of simultaneous transcription of *TLR7*  
442 and *TLR8* was again 7-fold greater on the Xa of women (group mean 31%) than on the X of  
443 XY men (4.1%; 95% CI: 2.4%–6.0%), while the overall frequency of positive events (for *TLR7*,

444 *TLR8*, or both genes together) was similar between women, normal men and men with  
445 Klinefelter syndrome (**Fig S5E**). Reciprocally, the frequency of monogenic expression (either  
446 *TLR7* or *TLR8*) was two-fold enriched on the X of XY men (group mean 69%) compared with  
447 the Xa of women (38%), with XXY KS men in between the two other groups (53%) (**Fig S5F**).  
448 These observations indicate that the Xa of women and XXY KS men is non-equivalent with the  
449 single X of XY men regarding the combined transcription of *TLR7* and *TLR8* in monocytes.

#### 450 ***TLR7* and *TLR8* are transcriptionally non-independent in monocytes**

451 The low frequency of monocytes from XY men where *TLR7* and *TLR8* were transcribed  
452 at the same time suggested that the two genes are transcriptionally non-independent from each  
453 other. To investigate this possibility, we cross-classified the cell counts in the RNA FISH data  
454 as 2×2 contingency tables, i.e., monocytes were stratified depending on the presence of signals  
455 for both *TLR7* and *TLR8*, either gene alone, or neither gene (**S3 Data**). This allowed the  
456 theoretical (expected) cell counts in each table cell to be calculated under the null hypothesis  
457 of independence between the two genes. We used this information to compute the observed-to-  
458 expected ratio (*obs/exp*) for double-positive events, namely the ratio of observed *TLR7*<sup>+</sup> *TLR8*<sup>+</sup>  
459 cell counts to the expected number of cells in this stratum assuming transcriptional  
460 independence between *TLR7* and *TLR8*. Non-independence would be denoted by a deviation  
461 from the critical value, *obs/exp* = 1, as a trend for either mutually exclusive (*obs/exp* < 1) or co-  
462 dependent (*obs/exp* > 1) transcription. As shown in **Fig 5C**, monocytes from euploid males  
463 comprised only one-half of the expected number of cells displaying *TLR7* and *TLR8* transcripts  
464 simultaneously, suggesting mutually exclusive transcription (*obs/exp* = 0.49; 95% CI: 0.35–  
465 0.62). Remarkably, we observed an excess of comparable magnitude for double-positive cells  
466 among monocytes from females (*obs/exp* = 1.62; 95% CI: 1.60–1.70) and KS males (*obs/exp* =  
467 1.70; 95% CI: 1.58–1.84), indicating a trend for co-dependent transcription.

468 In parallel, we used a classical measure of association between two nominal variables,  
469 Yule's Q coefficient of association in  $2 \times 2$  tables (61). Q can be intuitively interpreted by  
470 analogy with a correlation coefficient:  $Q = -1$  would denote mutually exclusive transcription  
471 of *TLR7* and *TLR8* in single cells;  $Q = 0$ , independent transcription at either locus; and  $Q = 1$ ,  
472 that both genes are always either on or off at the same time. We computed Yule's Q for each  
473 individual, together with the corresponding meta-analytical group summaries for this statistic  
474 (**Fig 5D**).  $Q = -0.48$  (95% CI:  $-0.61$  to  $-0.35$ ) in euploid men;  $Q = 0.54$  (95% CI:  $0.47$ – $0.61$ )  
475 in women; and  $Q = 0.53$  (95% CI:  $0.45$ – $0.60$ ) in KS men. Deviations from independence  
476 ( $Q = 0$ ) were significant for all groups ( $p < 0.0001$  in all instances). This analysis confirmed the  
477 transcriptional non-independence between *TLR7* and *TLR8* expression in women and KS men  
478 ( $Q > 0$ ), and the opposite patterns of transcriptional association in euploid men ( $Q < 0$ ).

479 The preceding analyses scored the cells without regard to the chromosome of origin of  
480 the transcripts in women and KS men ("Any X" data), but we carried out a parallel scoring  
481 procedure (**S4 Data**) restricted to  $Xa^+$  cells and considering only the alleles on the Xa. This  
482 analysis revealed a similar excess of *TLR7-TLR8* co-transcription among women with an  
483 elevated *obs/exp* ratio (*obs/exp* =  $1.24$ ; 95% CI:  $1.14$ – $1.32$ ) relative to XY men (*obs/exp* =  $0.31$ ;  
484 95% CI:  $0.20$ – $0.43$ ) (**Fig 5E**). The values for Yule's Q coefficient of association in the Xa-  
485 specific data paralleled the patterns for the *obs/exp* ratio, and confirmed a negative association  
486 between the transcription of *TLR7* and that of *TLR8* in euploid men ( $Q = -0.82$ ; 95% CI:  $-0.89$   
487 to  $-0.73$ ), and a positive association in women ( $Q = 0.50$ ; 95% CI:  $0.31$ – $0.66$ ) (**Fig 5F**).  
488 Consistent with *obs/exp*  $\approx 1$ , the group value for Yule's Q among KS men was not significantly  
489 different from  $Q = 0$  denoting independence, but we concluded that our group of five 47 XXY  
490 KS males non-homogeneous, because it encompassed euploid male-like, female-like, and  
491 neutral patterns of *TLR7-TLR8* co-transcription on the Xa (**Fig 5F**).

492 Taken together, these observations indicate the occurrence of mutually exclusive  
493 transcription of the genes *TLR7* and *TLR8* in *cis* in the monocytes from euploid men, in parallel  
494 with co-dependent transcription of these genes on the Xa of the monocytes from women, and a  
495 heterogenous phenotype in 47,XXY men.

#### 496 ***TLR7-TLR8* transcriptional dependency differs between the monocytic Xa and Xi**

497 Because only a fraction of the female monocytes analyzed exhibited XCI escape, the  
498 cross-classified cell counts based only on the Xi signals encompassed fewer positive cells, with  
499 instances of zero events in the double-positive ( $TLR7^+ TLR8^+$ ) stratum (**S2 Data**). To analyze  
500 these sparse data for Yule's Q, we pooled the cell counts group-wise to increase statistical  
501 power (**S2 Data**). **Fig S7A** shows the pooled data as  $2 \times 2$  contingency tables of observed  
502 frequencies, in a comparison with the frequencies expected under the null hypothesis of  
503 independent transcription at either Xi locus. The 95% CIs for Q straddle the critical value,  $Q =$   
504  $0$  in both the women and KS men groups, and the corresponding p-values from Monte Carlo  $\chi^2$   
505 tests were non-significant (**Fig S7B**). This result points to the absence of transcriptional  
506 association between the two genes on the Xi (**Fig S7B**). Next, we contrasted these *TLR7-TLR8*  
507 co-transcription data for the Xi with the data for the Xa of women and KS men (**Fig 5E,F and**  
508 **S5 Data**). We performed Monte Carlo  $\chi^2$  tests on  $3 \times 2$  tables of cell counts to formally compare  
509 the relative proportions of  $TLR7^+ TLR8^+$ ,  $TLR7^- TLR8^+$ , and  $TLR7^+ TLR8^-$  cells in the Xa and  
510 the Xi of individual donors. The tests demonstrated significant differences between the Xa and  
511 the Xi for all individuals (**S5 Data**), and there is therefore a conclusive divergence between the  
512 marked *TLR7-TLR8* transcriptional co-dependency on the Xa (**Fig 5E,F**) and the trend for non-  
513 dependency observed on the Xi alleles (**Fig S7A,B**).

514 ***TLR7* and *TLR8* are transcriptionally non-independent in  $CD4^+$  T cells**

515 Further to the study of monocytes, we applied a similar strategy to  $CD4^+$  T cells from  
516 women and euploid men. We scored first the cells regardless of the Xa marking (Any X data),  
517 and **Fig 6A** shows that, similar to monocytes,  $TLR7^+ TLR8^+$  events among female T cells were  
518 more frequent than among the male cells: 13% of cells versus only 2% in males, a 6:1 ratio  
519 consistent with the 7:1 ratio observed earlier in monocytes (**S6 Data**). There was a clear excess  
520 of  $TLR7^+ TLR8^+$  cell counts among the female T cells ( $obs/exp = 2.27$ ; 95% CI: 2.15–2.40) (**Fig**  
521 **6B**), a pattern even more pronounced here than in monocytes. The male cells again displayed a  
522 shortfall in the expected number of  $TLR7^+ TLR8^+$  events ( $obs/exp = 0.77$ ; 95% CI: 0.56–1.00).  
523 Yule's Q coefficient confirmed the strong positive association in women ( $Q = 0.79$ ; 95% CI:  
524 0.75–0.84) (**Fig 6C**). The parallel analysis restricted to the Xa (i.e., of transcripts for a *TLR7*-  
525 *TLR8* gene pair in an obligate *cis* topology) revealed a similar contrast (**Fig 6D**) between the  
526 excess of double positive cells in women:  $obs/exp = 1.19$ ; 95% CI: 1.15–1.23) and the shortfall  
527 in euploid men ( $obs/exp = 0.55$ ; 95% CI: 0.42–0.69). On the Xa, the negative association was  
528 conclusive ( $Q = -0.56$ ; 95% CI: -0.68 to -0.43;  $p < 0.0001$ ) and of a similar magnitude to the  
529 association observed earlier in male monocytes (**Fig 5E**). The analysis for Yule's Q  
530 corroborated the positive transcriptional association of the two Xa genes in women's T cells  
531 (**Fig 6F**). In summary, the observations in both  $CD14^+$  monocytes and  $CD4^+$  T cells outline a  
532 pattern of mutually exclusive transcription for the adjacent *TLR7* and *TLR8* genes in the cells  
533 from euploid men, and an opposite pattern of co-dependent transcription of these genes in the  
534 cells from women. This is further proof of functional non-equivalence for this locus between  
535 the single X chromosome of men and the active X chromosome of women.

## 536 **Female immune cells express higher levels of TLR8 protein than male cells**

537 We previously reported that female PBMCs expressed higher levels of TLR7 protein by  
538 western blot, including the full-length (140-kDa) and proteolytically mature (75-kDa) forms of  
539 the protein (56, 73). We performed a similar analysis by comparing TLR8 expression between  
540 male and female PBMCs using a highly specific TLR8-specific antibody (6). Normalized TLR8  
541 protein expression was significantly higher in female than in male PBMCs (**Fig 7A,B**), despite  
542 similar proportions of monocytes between either sex (**Fig 7C, Fig S8AB**). Because monocytes  
543 were found to express the highest level of TLR8 protein compared with other immune cell  
544 populations (not shown), we next analyzed TLR8 expression by flow cytometry within  
545 monocyte subsets defined by the expression profile of the CD14 and CD16 markers (**Fig. 7D,**  
546 **Fig S8A**). Whereas CD14<sup>+</sup>CD16<sup>-</sup> classical and CD14<sup>+</sup>CD16<sup>+</sup> intermediate monocytes all  
547 expressed TLR8 protein to variable degrees, only 60% on average of non-classical  
548 CD16<sup>+</sup>CD14<sup>-</sup> monocytes positively stained for TLR8 (**Fig 7D**). Geometric mean fluorescence  
549 intensities (GMFIs) of TLR8<sup>+</sup> cells revealed higher TLR8 protein expression for all subsets of  
550 female monocytes than in their male counterparts (**Fig 7E-G**). Together, using two different  
551 highly specific mAbs (6, 40), our data provide evidence for higher TLR8 protein expression in  
552 female than in male leukocytes, including all monocyte subpopulations.

## 553 **Discussion**

554 Here, we conducted a comprehensive single-cell resolution analysis of the  
555 transcriptional regulation of the X-linked genes encoding RNA-specific Toll-like receptors,  
556 *TLR7* and *TLR8*, in CD14<sup>+</sup> monocytes and CD4<sup>+</sup> T lymphocytes, where both receptors are  
557 expressed. By analyzing for primary transcript expression relative to the Xa and Xi  
558 chromosome territories, we unequivocally demonstrated that *TLR8*, like *TLR7*, escapes XCI in

559 female and in 47,XXY KS male monocytes. We show also that both genes escape XCI in a  
560 substantial proportion of T cells despite lower mRNA expression levels than in monocytes (16,  
561 74), with *TLR7* and *TLR8* bi-allelic cells observable in all our female donors. When we analyzed  
562 *TLR7* and *TLR8* transcripts together, distinct co-expression profiles emerged between our three  
563 study groups. Surprisingly, these differences were attributable not only to the ability of females  
564 and KS males to express *TLR7* and *TLR8* on the Xi, but also to the joint transcriptional behavior  
565 of the *TLR7-TLR8* gene pair on the active X chromosome specifically. Monocytes and T cells  
566 from women and KS men exhibited higher-than-expected frequencies of cells co-transcribing  
567 the two genes, in contrast to a striking trend against simultaneous transcription of the *TLR7* and  
568 *TLR8* genes on the single X of euploid men. Corroborating our RNA FISH results, we found  
569 higher TLR8 protein expression in female than in male leukocytes, including all monocyte  
570 subpopulations. In summary, our findings provide compelling evidence for sex-specific  
571 transcriptional regulation of the X-linked TLR locus on the active X of healthy subjects, which  
572 may have important consequences for the functional make-up of monocyte and T-cell  
573 populations.

574         The key findings of the present work are thus the marked association between the  
575 transcription of *TLR7* and that of *TLR8* in single cells, and that this association is of positive  
576 sign in women and negative in normal men. Simultaneous transcription of *TLR7* and *TLR8* was  
577 disproportionally frequent in female monocytes and T cells, and disproportionally scarce in the  
578 cells from normal men, and we traced this back to the behavior of the alleles carried in cis on  
579 the Xa of women and on the single X chromosome of euploid men. In some of our KS patients,  
580 by contrast, there was discordance between the whole-cell and Xa-specific patterns of *TLR7*-  
581 *TLR8* transcription, which could have arisen from undetected 46,XY/47,XXY mosaicism (75).  
582 Overall, our findings imply that the Xa in XX and XXY karyotypes, and the single X of normal  
583 men are functionally non-equivalent as regards the TLR genes. Besides, transcriptional non-



584 independence between *TLR7* and *TLR8* indicates that these genes, which encode the two  
585 isoforms of the human TLR for single-stranded RNA, form a co-regulated gene cluster. We  
586 propose to name this cluster the X-linked TLR locus to acknowledge this previously  
587 unsuspected layer of transcriptional regulation.

588         Because RNA FISH provides a single-cell snapshot of the transcriptional state of each  
589 allele at the time of cell harvest, our data must be interpreted within the notion that genes are  
590 not transcribed continuously but in bursts or pulses separated by silent periods (76). Alleles  
591 permissive for transcription but analyzed between pulses may thus appear negative, and  
592 hybridization-positive cell counts probably underestimate the proportion of expressing cells or  
593 the frequency of escape from XCI. This likely explains that, in female monocytes, the average  
594 frequency for *TLR7* escape determined here by RNA FISH is lower (13.3% versus 30%) than  
595 in our previous study, which employed instead reverse transcription and PCR amplification on  
596 the mRNA pool of individual cells (48). Regardless of the technique employed, our results are  
597 compatible with the notion that the *TLR7* and *TLR8* genes on the Xi may not be poised for  
598 transcription in all cells, and that this status may be relatively stable within cells as previously  
599 suggested (48, 77). In favor of this hypothesis, we previously provided evidence for a causal  
600 link between X chromosome dosage, XCI escape and increased functional TLR7-driven  
601 responses in human B cells (48) and pDCs (78), where bi-allelic *TLR7* expression at single-cell  
602 resolution was strongly correlated with enhanced responsiveness to cognate ligands. Along the  
603 same line, female pDCs with bi-allelic *TLR7* transcription displayed heightened basal levels of  
604 mRNA for IFN- $\alpha$  and IFN- $\beta$ , which suggests that baseline TLR7 sensing of endogenous ligands  
605 contributes to the functional heterogeneity of pDCs (78, 79). This mechanism and its effects  
606 should be investigated in further human immune cell populations, such as monocytes and  
607 macrophages, in respect of TLR7 but also TLR8. A relevant study in mice has recently  
608 identified a robust sexual dimorphism in tissue macrophages (80) by using transcriptome and

609 ATAC (assay for transposase-accessible chromatin) profiling of untreated and IFN-induced  
610 immune cells. This study suggested that female macrophages exhibited a higher basal potential  
611 of innate immunity pathways prior to immune challenge, and that the resulting enhancement of  
612 immune alertness made females less susceptible to infectious diseases (80). Future work should  
613 delve deeper into the heterogeneity of these and further immune cell populations, such as T  
614 lymphocytes, and possibly define the role of endogenous X-linked TLR signaling in the  
615 acquisition of this sex-specific functional heterogeneity.

616 We hypothesize that the versatile sex-specific transcriptional patterns in the X-linked  
617 TLR locus arise from either *cis* or *trans*-acting factors, or both. The significant difference  
618 between the Xa and the Xi of individual females regarding *TLR7-TLR8* joint transcriptional  
619 patterns clearly argues for *cis*-acting factors. The analyses of available Hi-C datasets suggest  
620 that although *TLR7* and *TLR8* lie very close to each other on the X chromosome, and fall within  
621 the same domain of interactions, the two genes seem to form different sub-domains of  
622 interactions that may explain the versatility of the regulation of their expression, with conditions  
623 of co-regulation, or co-exclusion or independence, which could be influenced by sex-specific  
624 factors, genetic predisposition or the inflammatory environment.

625 A limitation of the present work is that RNA FISH is not informative on the past or  
626 future evolution of the cell, and also that the RNA FISH readout cannot at present be readily  
627 correlated with protein quantitation on a single-cell basis, whether by flow cytometry or by  
628 emerging techniques such as single-cell proteomics (81). Of note, we previously reported  
629 greater levels of TLR7 protein in the PBMCs of women relative to men (48, 56), and the present  
630 study shows a similar trend regarding TLR8 protein expression, which positively correlates  
631 with the greater frequency of RNA FISH signals observed in female cells. Whether this  
632 difference translates into sex-specific responses to TLR8-specific ligands warrants further  
633 investigation. Although RNA FISH showed sexual karyotype-biased patterns of transcription

634 at the X-linked TLR locus, this did not translate into specialized cell subpopulations with  
635 predominant expression of either TLR7 or TLR8 in males, as the frequencies of TLR8<sup>+</sup> cells  
636 were similar between males and females. Another intriguing question, prompted by evidence  
637 of functional attenuation of TLR7 by TLR8 in mouse and human mutants (37, 38, 40), is  
638 whether the different patterns of co-transcription observed here determine a sex bias with regard  
639 to TLR8:TLR7 protein ratios in individual cells, and hence possibly different outcomes of the  
640 exposure to relevant ligands.

### 641 **Perspectives and significance**

642 This work constitutes, to our knowledge, an unprecedented single-cell exploration of  
643 the transcriptional activity of the X-linked TLR locus according to sex and the sexual karyotype.  
644 Together with our earlier study of the *TLR7* gene (48), it provides proof that sex is a critical  
645 factor to consider in studying the function and biological significance of the two Toll-like  
646 receptors for single-stranded RNA. In addition to the immense worldwide toll of 76  
647 autoimmune disorders (82), and many disabling and life-threatening microbial pathogens, these  
648 new insights into the biology of TLR7 and TLR8 are of translational significance to vaccine  
649 design, where development of TLR7 and TLR8 agonists as vaccine adjuvants constitutes a  
650 promising field of research (83).

### 651 **Abbreviations**

652 CD, confidence distribution; CI, confidence interval; DAPI, 4',6-diamidino-2-phenylindole;  
653 Hi-C, high-resolution chromosome conformation capture analysis; IFN, interferon; KS,  
654 Klinefelter syndrome; mAb, monoclonal antibody; *obs/exp*, observed-to-expected ratio;  
655 PBMCs, peripheral blood mononuclear cells; pDCs, plasmacytoid dendritic cells; RNA FISH,

656 RNA fluorescence *in situ* hybridization; TAD, topologically associating domain; TLR, Toll-  
657 like receptor; Xa, active X chromosome; XCI, X chromosome inactivation; Xi, inactive X  
658 chromosome.

## 659 **Acknowledgments**

660 We are grateful to the staff of the core facilities at Infinity, Toulouse, for excellent technical  
661 support, especially P.-E. Paulet and R. Romieu-Mourez (immune monitoring biobank); F.  
662 L'Faqihi, V. Duplan-Eche, A-L Iscache, H. Garnier, and P. Menut (cytometry and cell sorting  
663 facility); and S. Allart, S. Lachambre, and L. Lobjois (cell imaging facility). We also thank M.  
664 Savignac (Inserm U1291, Infinity) for helpful discussions and advice, and Dr. Honghai Zhang  
665 for insights into TLR molecular evolution. The technical assistance of Flora Abbas (Inserm  
666 U1291, Infinity) is also gratefully acknowledged.

## 667 **Authors' contributions**

668 AY, JC, FB, JEM and JCG conceptualized the present study. AY, JC, JEM and JCG analyzed  
669 the data and supervised experiments. SG provided essential resources. AY, CC and BFL  
670 performed experiments and analyzed the data. JC performed the Hi-C analysis. AY, JEM, FJB  
671 and JCG secured funding for this project. AY, JEM and JCG wrote the manuscript with input  
672 from their co-authors. All authors read and approved the final version of the manuscript.

## 673 **Funding**

674 This work was supported by grants from the Scleroderma Foundation to FJB and JCG, and from  
675 the FOREUM Foundation for Research in Rheumatology to JCG. JCG is supported by further  
676 grants from the Agence Nationale de la Recherche (ANR-20-CE15-0014; ANR-20-COV8-  
677 0004-01), Fondation pour la Recherche Médicale (DEQ20180339187), the Inspire Program  
678 from Région Occitanie/Pyrénées-Méditerranée (#1901175), and the European Régional  
679 Development Fund (MP0022856). BFL was supported by a post-doctoral fellowship from the  
680 Inspire Program from Région Occitanie/Pyrénées-Méditerranée (#1901175). AY was  
681 supported by a fellowship from SIDACTION, CSL Behring Research funds, an award from  
682 Fondation des Treilles, and a bursary from Association de la Charité des Jeunes de Kafarsir,  
683 (Lebanon).

## 684 **Declarations**

### 685 **Ethics approval and consent to participate**

686 This study was approved by the relevant ethics board as described in the Materials and Methods  
687 section. Written consent was obtained from each patient or, for child participants, from the legal  
688 guardian.

### 689 **Consent for publication**

690 Not applicable.

### 691 **Availability of data and materials**

692 The data supporting the findings of this study are available within the article and its  
693 Supplementary Information. R scripts developed for the analysis of RNA FISH data are publicly

694 available in the Zenodo repository, and the relevant identifiers are provided in the Materials  
695 and Methods section.

## 696 **Competing interests**

697 The authors declare that they have no competing interests.

698

699

## 700 **References**

- 701 1. Beignon A-S, McKenna K, Skoberne M, Manches O, DaSilva I, Kavanagh DG, et al.  
702 Endocytosis of HIV-1 activates plasmacytoid dendritic cells via Toll-like receptor–viral RNA  
703 interactions. *J Clin Invest*. 2005;115(11):3265-75.
- 704 2. Diebold SS, Kaisho T, Hemmi H, Akira S, Reis e Sousa C. Innate antiviral responses  
705 by means of TLR7-mediated recognition of single-stranded RNA. *Science*.  
706 2004;303(5663):1529-31.
- 707 3. Heil F, Hemmi H, Hochrein H, Ampenberger F, Kirschning C, Akira S, et al. Species-  
708 specific recognition of single-stranded RNA via Toll-like receptor 7 and 8. *Science*.  
709 2004;303(5663):1526-9.
- 710 4. Lund JM, Alexopoulou L, Sato A, Karow M, Adams NC, Gale NW, et al. Recognition  
711 of single-stranded RNA viruses by Toll-like receptor 7. *Proc Natl Acad Sci U S A*.  
712 2004;101(15):5598-603.
- 713 5. Melchjorsen J, Jensen Søren B, Malmgaard L, Rasmussen Simon B, Weber F, Bowie  
714 Andrew G, et al. Activation of innate defense against a paramyxovirus is mediated by RIG-I  
715 and TLR7 and TLR8 in a cell-type-specific manner. *J Virol*. 2005;79(20):12944-51.
- 716 6. Greulich W, Wagner M, Gaidt MM, Stafford C, Cheng Y, Linder A, et al. TLR8 Is a  
717 Sensor of RNase T2 Degradation Products. *Cell*. 2019;179(6):1264-75 e13.
- 718 7. Ugolini M, Gerhard J, Burkert S, Jensen KJ, Georg P, Ebner F, et al. Recognition of  
719 microbial viability via TLR8 drives TFH cell differentiation and vaccine responses. *Nat*  
720 *Immunol*. 2018;19(4):386-96.

- 721 8. Caetano BC, Carmo BB, Melo MB, Cerny A, dos Santos SL, Bartholomeu DC, et al.  
722 Requirement of UNC93B1 reveals a critical role for TLR7 in host resistance to primary  
723 infection with *Trypanosoma cruzi*. *J Immunol*. 2011;187(4):1903-11.
- 724 9. Biondo C, Malara A, Costa A, Signorino G, Cardile F, Midiri A, et al. Recognition of  
725 fungal RNA by TLR7 has a nonredundant role in host defense against experimental candidiasis.  
726 *Eur J Immunol*. 2012;42(10):2632-43.
- 727 10. Barrat FJ, Meeker T, Gregorio J, Chan JH, Uematsu S, Akira S, et al. Nucleic acids of  
728 mammalian origin can act as endogenous ligands for Toll-like receptors and may promote  
729 systemic lupus erythematosus. *J Exp Med*. 2005;202(8):1131-9.
- 730 11. Shibata T, Ohto U, Nomura S, Kibata K, Motoi Y, Zhang Y, et al. Guanosine and its  
731 modified derivatives are endogenous ligands for TLR7. *Int Immunol*. 2015.
- 732 12. Barrat FJ, Elkon KB, Fitzgerald KA. Importance of Nucleic Acid Recognition in  
733 Inflammation and Autoimmunity. *Annu Rev Med*. 2016;67:323-36.
- 734 13. Shimizu T. Structural insights into ligand recognition and regulation of nucleic acid-  
735 sensing Toll-like receptors. *Curr Opin Struct Biol*. 2017;47:52-9.
- 736 14. Tanji H, Ohto U, Shibata T, Taoka M, Yamauchi Y, Isobe T, et al. Toll-like receptor 8  
737 senses degradation products of single-stranded RNA. *Nat Struct Mol Biol*. 2015;22(2):109-15.
- 738 15. Zhang Z, Ohto U, Shibata T, Krayukhina E, Taoka M, Yamauchi Y, et al. Structural  
739 Analysis Reveals that Toll-like Receptor 7 Is a Dual Receptor for Guanosine and Single-  
740 Stranded RNA. *Immunity*. 2016;45(4):737-48.
- 741 16. Guiducci C, Gong M, Cepika AM, Xu Z, Tripodo C, Bennett L, et al. RNA recognition  
742 by human TLR8 can lead to autoimmune inflammation. *J Exp Med*. 2013;210(13):2903-19.
- 743 17. Hornung V, Barchet W, Schlee M, Hartmann G. RNA recognition via TLR7 and TLR8.  
744 In: Bauer S, Hartmann G, editors. *Toll-Like Receptors (TLRs) and Innate Immunity. Handbook*  
745 *of Experimental Pharmacology*: Springer; 2008. p. 71-86.
- 746 18. Dominguez-Villar M, Gautron AS, de Marcken M, Keller MJ, Hafler DA. TLR7  
747 induces anergy in human CD4(+) T cells. *Nat Immunol*. 2015;16(1):118-28.
- 748 19. Fabié A, Mai LT, Dagenais-Lussier X, Hammami A, van Grevenynghe J, Stäger S. IRF-  
749 5 promotes cell death in CD4 T cells during chronic infection. *Cell Rep*. 2018;24(5):1163-75.
- 750 20. Li L, Liu X, Sanders KL, Edwards JL, Ye J, Si F, et al. TLR8-Mediated Metabolic  
751 Control of Human Treg Function: A Mechanistic Target for Cancer Immunotherapy. *Cell*  
752 *Metab*. 2019;29(1):103-23 e5.

- 753 21. Peng G, Guo Z, Kiniwa Y, Voo KS, Peng W, Fu T, et al. Toll-like receptor 8-mediated  
754 reversal of CD4<sup>+</sup> regulatory T cell function. *Science*. 2005;309(5739):1380-4.
- 755 22. Salvi V, Nguyen HO, Sozio F, Schioppa T, Gaudenzi C, Laffranchi M, et al. SARS-  
756 CoV-2-associated ssRNAs activate inflammation and immunity via TLR7/8. *JCI Insight*.  
757 2021;6(18).
- 758 23. Laurent P, Yang C, Rendeiro AF, Nilsson-Payant BE, Carrau L, Chandar V, et al.  
759 Sensing of SARS-CoV-2 by pDCs and their subsequent production of IFN-I contribute to  
760 macrophage-induced cytokine storm during COVID-19. *Sci Immunol*. 2022;7(75):eadd4906.
- 761 24. Barreiro LB, Ben-Ali M, Quach H, Laval G, Patin E, Pickrell JK, et al. Evolutionary  
762 dynamics of human Toll-like receptors and their different contributions to host defense. *PLoS*  
763 *Genet*. 2009;5(7):e1000562.
- 764 25. van der Made CI, Simons A, Schuurs-Hoeijmakers J, van den Heuvel G, Mantere T,  
765 Kersten S, et al. Presence of genetic variants among young men with severe COVID-19. *JAMA*.  
766 2020;324(7):663-73.
- 767 26. Fallerini C, Daga S, Mantovani S, Benetti E, Picchiotti N, Francisci D, et al. Association  
768 of Toll-like receptor 7 variants with life-threatening COVID-19 disease in males: findings from  
769 a nested case-control study. *eLife*. 2021;10:e67569.
- 770 27. Kosmicki JA, Horowitz JE, Banerjee N, Lanche R, Marcketta A, Maxwell E, et al. Pan-  
771 ancestry exome-wide association analyses of COVID-19 outcomes in 586,157 individuals. *Am*  
772 *J Hum Genet*. 2021;108(7):1350-5.
- 773 28. Solanich X, Vargas-Parra G, van der Made CI, Simons A, Schuurs-Hoeijmakers J,  
774 Antolí A, et al. Genetic screening for TLR7 variants in young and previously healthy men with  
775 severe COVID-19. *Front Immunol*. 2021;12.
- 776 29. Asano T, Boisson B, Onodi F, Matuozzo D, Moncada-Velez M, Maglorius Renkilaraj  
777 MRL, et al. X-linked recessive TLR7 deficiency in ~1% of men under 60 years old with life-  
778 threatening COVID-19. *Sci Immunol*. 2021;6(62):eabl4348.
- 779 30. Lind NA, Rael VE, Pestal K, Liu B, Barton GM. Regulation of the nucleic acid-sensing  
780 Toll-like receptors. *Nat Rev Immunol*. 2022;22(4):224-35.
- 781 31. Sharma S, Fitzgerald KA, Cancro MP, Marshak-Rothstein A. Nucleic Acid-Sensing  
782 Receptors: Rheostats of Autoimmunity and Autoinflammation. *J Immunol*. 2015;195(8):3507-  
783 12.



- 784 32. Pisitkun P, Deane JA, Difilippantonio MJ, Tarasenko T, Satterthwaite AB, Bolland S.  
785 Autoreactive B cell responses to RNA-related antigens due to TLR7 gene duplication. *Science*.  
786 2006;312(5780):1669-72.
- 787 33. Deane JA, Pisitkun P, Barrett RS, Feigenbaum L, Town T, Ward JM, et al. Control of  
788 toll-like receptor 7 expression is essential to restrict autoimmunity and dendritic cell  
789 proliferation. *Immunity*. 2007;27(5):801-10.
- 790 34. Ricker E, Manni M, Flores-Castro D, Jenkins D, Gupta S, Rivera-Correa J, et al. Altered  
791 function and differentiation of age-associated B cells contribute to the female bias in lupus  
792 mice. *Nat Commun*. 2021;12(1):4813.
- 793 35. Berland R, Fernandez L, Kari E, Han J-H, Lomakin I, Akira S, et al. Toll-like receptor  
794 7-dependent loss of B cell tolerance in pathogenic autoantibody knockin mice. *Immunity*.  
795 2006;25(3):429-40.
- 796 36. Christensen SR, Shupe J, Nickerson K, Kashgarian M, Flavell RA, Shlomchik MJ. Toll-  
797 like receptor 7 and TLR9 dictate autoantibody specificity and have opposing inflammatory and  
798 regulatory roles in a murine model of lupus. *Immunity*. 2006;25(3):417-28.
- 799 37. Demaria O, Pagni PP, Traub S, de Gassart A, Branzk N, Murphy AJ, et al. TLR8  
800 deficiency leads to autoimmunity in mice. *J Clin Invest*. 2010;120(10):3651-62.
- 801 38. Desnues B, Macedo AB, Roussel-Queval A, Bonnardel J, Henri S, Demaria O, et al.  
802 TLR8 on dendritic cells and TLR9 on B cells restrain TLR7-mediated spontaneous  
803 autoimmunity in C57BL/6 mice. *Proc Natl Acad Sci U S A*. 2014;111(4):1497-502.
- 804 39. Brown GJ, Cañete PF, Wang H, Medhavy A, Bones J, Roco JA, et al. TLR7 gain-of-  
805 function genetic variation causes human lupus. *Nature*. 2022;605(7909):349-56.
- 806 40. Fejtkova M, Sukova M, Hlozkova K, Skvarova Kramarzova K, Rackova M, Jakubec D,  
807 et al. TLR8/TLR7 dysregulation due to a novel TLR8 mutation causes severe autoimmune  
808 hemolytic anemia and autoinflammation in identical twins. *Am J Hematol*. 2022;97(3):338-51.
- 809 41. Liu G, Zhang H, Zhao C, Zhang H. Evolutionary history of the Toll-like receptor gene  
810 family across vertebrates. *Genome Biol Evol*. 2020;12(1):3615-34.
- 811 42. Benton MJ. *Vertebrate Palaeontology*. 4th ed: Wiley Blackwell; 2015.
- 812 43. Dossin F, Heard E. *The Molecular and Nuclear Dynamics of X-Chromosome*  
813 *Inactivation*. Cold Spring Harb Perspect Biol. 2021.
- 814 44. Skuse D, Printzlau F, Wolstencroft J. Sex chromosome aneuploidies. In: Geschwind  
815 DH, Paulson HL, Klein C, editors. *Handbook of Clinical Neurology*. 147: Elsevier; 2018. p.  
816 355-76.

- 817 45. Carrel L, Willard HF. X-inactivation profile reveals extensive variability in X-linked  
818 gene expression in females. *Nature*. 2005;434(7031):400-4.
- 819 46. Peeters SB, Cotton AM, Brown CJ. Variable escape from X-chromosome inactivation:  
820 identifying factors that tip the scales towards expression. *Bioessays*. 2014;36(8):746-56.
- 821 47. Tukiainen T, Villani AC, Yen A, Rivas MA, Marshall JL, Satija R, et al. Landscape of  
822 X chromosome inactivation across human tissues. *Nature*. 2017;550(7675):244-8.
- 823 48. Souyris M, Cenac C, Azar P, Daviaud D, Canivet A, Grunenwald S, et al. *TLR7* escapes  
824 X chromosome inactivation in immune cells. *Sci Immunol*. 2018;3(19):eaap8855.
- 825 49. Abbas F, Cenac C, Youness A, Azar P, Delobel P, Guery JC. HIV-1 infection enhances  
826 innate function and *TLR7* expression in female plasmacytoid dendritic cells. *Life Sci Alliance*.  
827 2022;5(10).
- 828 50. Scofield RH, Bruner GR, Namjou B, Kimberly RP, Ramsey-Goldman R, Petri M, et al.  
829 Klinefelter's syndrome (47,XXY) in male systemic lupus erythematosus patients: support for  
830 the notion of a gene-dose effect from the X chromosome. *Arthritis Rheum*. 2008;58(8):2511-7.
- 831 51. Harris VM, Sharma R, Cavett J, Kurien BT, Liu K, Koelsch KA, et al. Klinefelter's  
832 syndrome (47,XXY) is in excess among men with Sjögren's syndrome. *Clin Immunol*.  
833 2016;168:25-9.
- 834 52. Scofield RH, Lewis VM, Cavitt J, Kurien BT, Assassi S, Martin J, et al. 47XXY and  
835 47XXX in Scleroderma and Myositis. *ACR Open Rheumatol*. 2022.
- 836 53. Caron G, Duluc D, Fremaux I, Jeannin P, David C, Gascan H, et al. Direct stimulation  
837 of human T cells via *TLR5* and *TLR7/8*: flagellin and R-848 up-regulate proliferation and IFN-  
838 gamma production by memory CD4+ T cells. *J Immunol*. 2005;175(3):1551-7.
- 839 54. de Marcken M, Dhaliwal K, Danielsen AC, Gautron AS, Dominguez-Villar M. *TLR7*  
840 and *TLR8* activate distinct pathways in monocytes during RNA virus infection. *Sci Signal*.  
841 2019;12(605):eaaw1347.
- 842 55. Meas HZ, Haug M, Beckwith MS, Louet C, Ryan L, Hu Z, et al. Sensing of HIV-1 by  
843 *TLR8* activates human T cells and reverses latency. *Nature communications*. 2020;11(1):147.
- 844 56. Azar P, Mejia JE, Cenac C, Shaiykova A, Youness A, Laffont S, et al. *TLR7* dosage  
845 polymorphism shapes interferogenesis and HIV-1 acute viremia in women. *JCI Insight*.  
846 2020;5(12):e136047.
- 847 57. Smit A, Hubley R, Green P. RepeatMasker Open-4.0 2013-2015 [Available from:  
848 <https://www.repeatmasker.org>].

- 849 58. Greenfield A, Carrel L, Pennisi D, Philippe C, Quaderi N, Siggers P, et al. The UTX  
850 gene escapes X inactivation in mice and humans. *Hum Mol Genet.* 1998;7(4):737-42.
- 851 59. Chaumeil J, Augui S, Chow JC, Heard E. Combined immunofluorescence, RNA  
852 fluorescent in situ hybridization, and DNA fluorescent in situ hybridization to study chromatin  
853 changes, transcriptional activity, nuclear organization, and X-chromosome inactivation. In:  
854 Hancock R, editor. *The Nucleus. 1: Nuclei and subnuclear components.* Totowa, N.J.: Humana  
855 Press; 2008. p. 297-308.
- 856 60. R Core Team. *R: A language and environment for statistical computing.* R Foundation  
857 for Statistical Computing, Vienna, Austria. 2022.
- 858 61. Berry KJ, Johnston JE, Mielke PW. *Fourfold Contingency Tables, I. The Measurement*  
859 *of Association: A Permutation Statistical Approach.* Cham, Switzerland: Springer; 2018. p.  
860 511-76.
- 861 62. Yang G, Cheng JQ, Xie M, Qian W. *gmeta: Meta-analysis via a unified framework of*  
862 *confidence distribution.* R package version 2.3-1. 2021.
- 863 63. Xie Mg, Singh K. Confidence distribution, the frequentist distribution estimator of a  
864 parameter: A review. *Int Stat Rev.* 2013;81(1):3-39.
- 865 64. Durand NC, Robinson JT, Shamim MS, Machol I, Mesirov JP, Lander ES, et al.  
866 Juicebox provides a visualization system for Hi-C contact maps with unlimited zoom. *Cell Syst.*  
867 2016;3(1):99-101.
- 868 65. Rao SSP, Huntley MH, Durand NC, Stamenova EK, Bochkov ID, Robinson JT, et al.  
869 A 3D map of the human genome at kilobase resolution reveals principles of chromatin looping.  
870 *Cell.* 2014;159(7):1665-80.
- 871 66. Phanstiel DH, Van Bortle K, Spacek D, Hess GT, Shamim MS, Machol I, et al. Static  
872 and dynamic DNA loops form AP-1-bound activation hubs during macrophage development.  
873 *Mol Cell.* 2017;67(6):1037-48.e6.
- 874 67. Zhang X, Jeong M, Huang X, Wang XQ, Wang X, Zhou W, et al. Large DNA  
875 methylation nadirs anchor chromatin loops maintaining hematopoietic stem cell identity. *Mol*  
876 *Cell.* 2020;78(3):506-21.e6.
- 877 68. Lieberman-Aiden E, van Berkum NL, Williams L, Imakaev M, Ragoczy T, Telling A,  
878 et al. Comprehensive mapping of long-range interactions reveals folding principles of the  
879 human genome. *Science.* 2009;326(5950):289-93.
- 880 69. Giorgetti L, Lajoie BR, Carter AC, Attia M, Zhan Y, Xu J, et al. Structural organization  
881 of the inactive X chromosome in the mouse. *Nature.* 2016;535(7613):575-9.

- 882 70. Savarese F, Flahndorfer K, Jaenisch R, Busslinger M, Wutz A. Hematopoietic precursor  
883 cells transiently reestablish permissiveness for X inactivation. *Mol Cell Biol.*  
884 2006;26(19):7167-77.
- 885 71. Syrett CM, Sindhava V, Hodawadekar S, Myles A, Liang G, Zhang Y, et al. Loss of  
886 Xist RNA from the inactive X during B cell development is restored in a dynamic YY1-  
887 dependent two-step process in activated B cells. *PLoS Genet.* 2017;13(10):e1007050.
- 888 72. Wang J, Syrett CM, Kramer MC, Basu A, Atchison ML, Anguera MC. Unusual  
889 maintenance of X chromosome inactivation predisposes female lymphocytes for increased  
890 expression from the inactive X. *Proc Natl Acad Sci U S A.* 2016;113(14):E2029-38.
- 891 73. Souyris M, Cenac C, Azar P, Daviaud D, Canivet A, Grunenwald S, et al. TLR7 escapes  
892 X chromosome inactivation in immune cells. *Sci Immunol.* 2018;3(19):eaap8855.
- 893 74. Hornung V, Rothenfusser S, Britsch S, Krug A, Jahrsdorfer B, Giese T, et al.  
894 Quantitative Expression of Toll-Like Receptor 1-10 mRNA in Cellular Subsets of Human  
895 Peripheral Blood Mononuclear Cells and Sensitivity to CpG Oligodeoxynucleotides. *The*  
896 *Journal of Immunology.* 2002;168(9):4531-7.
- 897 75. Lanfranco F, Kamischke A, Zitzmann M, Nieschlag E. Klinefelter's syndrome. *Lancet.*  
898 2004;364(9430):273-83.
- 899 76. Wang YL, Ni TF, Wang W, Liu F. Gene transcription in bursting: a unified mode for  
900 realizing accuracy and stochasticity. *Biol Rev Camb Philos Soc.* 2019;94(1):248-58.
- 901 77. Souyris M, Mejía JE, Chaumeil J, Guéry J-C. Female predisposition to TLR7-driven  
902 autoimmunity: gene dosage and the escape from X chromosome inactivation. *Semin*  
903 *Immunopathol.* 2019;41(2):153-64.
- 904 78. Hagen SH, Henseling F, Hennesen J, Savel H, Delahaye S, Richert L, et al.  
905 Heterogeneous escape from X chromosome inactivation results in sex differences in type I IFN  
906 responses at the single human pDC level. *Cell Rep.* 2020;33(10):108485.
- 907 79. Wimmers F, Subedi N, van Buuringen N, Heister D, Vivie J, Beeren-Reinieren I, et al.  
908 Single-cell analysis reveals that stochasticity and paracrine signaling control interferon-alpha  
909 production by plasmacytoid dendritic cells. *Nature communications.* 2018;9(1):3317.
- 910 80. Gal-Oz ST, Maier B, Yoshida H, Seddu K, Elbaz N, Czysz C, et al. ImmGen report:  
911 sexual dimorphism in the immune system transcriptome. *Nature communications.*  
912 2019;10(1):4295.
- 913 81. Marx V. A dream of single-cell proteomics. *Nat Methods.* 2019;16(9):809-12.

914 82. Bender M, Christiansen J, Quick M. The terrible toll of 76 autoimmune diseases. Sci  
915 Am. 2021;325(3):31-3.

916 83. Dowling DJ. Recent advances in the discovery and delivery of TLR7/8 agonists as  
917 vaccine adjuvants. Immunohorizons. 2018;2(6):185-97.

918

919

920

921

922

923

924

925

926

927

928

929

930

931

932

933

934 **Figures and Figure legends**

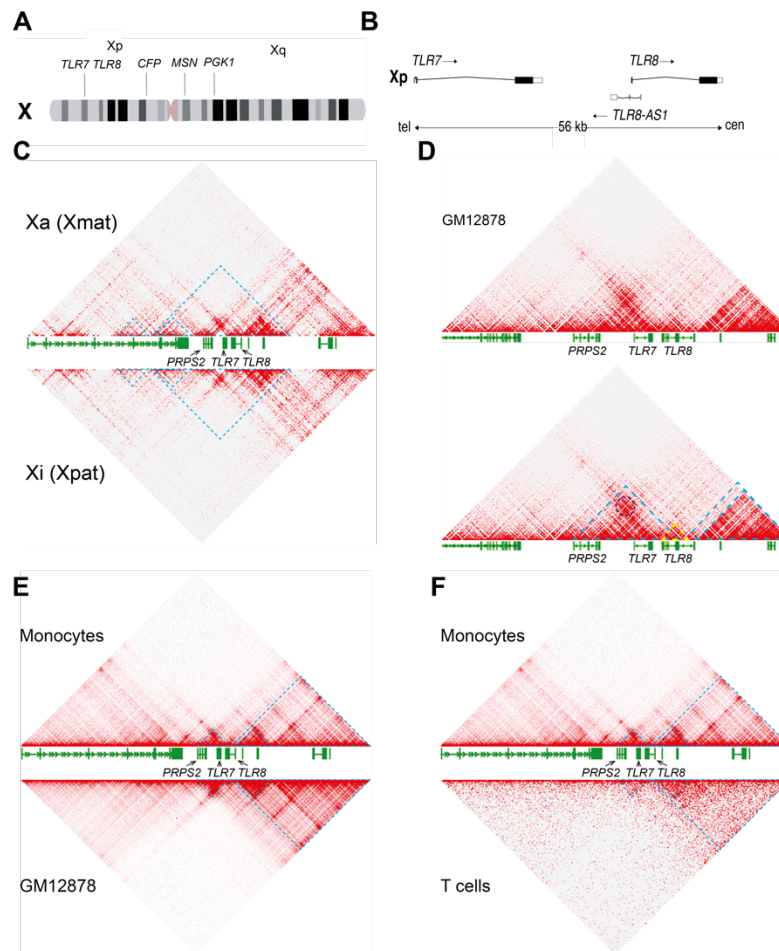

935

936 **Figure 1. 3D conformation of the *TLR7-TLR8* genomic region in male and female cells.**  
 937 (A) Idiogram of the human X chromosome with the positions of the adjacent genes, *TLR7* and  
 938 *TLR8*, and three marker genes, *CFP*, *MSN* and *PGK1*, that do not evade X chromosome  
 939 inactivation. (B) Map of the *TLR7*, *TLR8-AS1* and *TLR8* locus on Xp22.2; tel, cen denote the  
 940 telomeric and centromeric ends of the map. (C) Hi-C map of interactions around the *TLR7-TLR8*  
 941 region on the active (Xa, top panel) or inactive (Xi, bottom panel) X chromosome at 5 kb-  
 942 resolution in GM12878 human female cells. (D) Hi-C map of interactions around the *TLR7-*  
 943 *TLR8* region at 1 kb-resolution in GM12878 human female cells (datasets in C and D from Rao  
 944 et al, 2014). The dark blue circle denotes a peak of interaction (loop) between *TLR7* and *PRPS2*  
 945 as determined by the Peak tool in the Juicebox software. Blue and yellow dashed lines represent  
 946 domains of preferential interactions as defined by the "Contact Domain" tool in the Juicebox  
 947 software. (E, F) Hi-C maps of interactions around the *TLR7-TLR8* region at 5-kb resolution in  
 948 human male monocytes (E, F), top panels; dataset from Phanstiel et al, 2017) versus GM12878  
 949 human female cells (E, bottom panel, dataset from Rao et al, 2014) or male T cells (F, bottom  
 950 panel, dataset from Zhang et al, 2020). Blue dashed lines represent domains of preferential  
 951 interactions as defined by the "Contact Domain" tool in the Juicebox software.

952

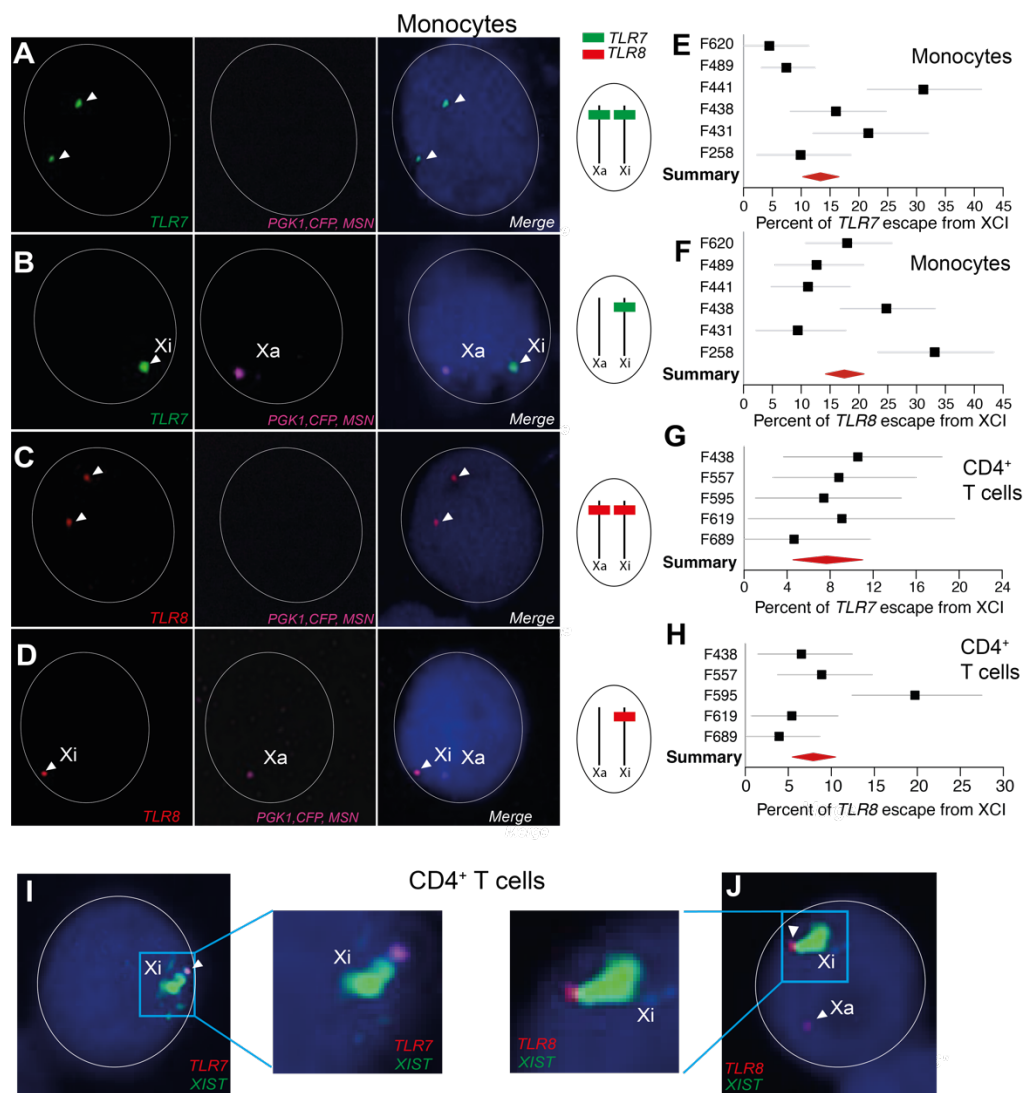

953

954 **Figure 2. *TLR7* and *TLR8* evade X chromosome inactivation in the monocytes and CD4<sup>+</sup>**  
 955 **T cells of women. (A-D)** RNA FISH analysis of CD14<sup>+</sup> monocytes from female donors. The  
 956 images show confocal microscopy planes of cell nuclei after hybridization with fluorescent  
 957 probes for transcripts arising from *TLR7* (green), *TLR8* (red), and the marker gene triad  
 958 transcribed from the Xa only (*PGK1, CFP, MSN*; pink). Nuclei are counterstained with 4',6-  
 959 diamidino-2-phenylindole (DAPI; blue). The arrow heads in (A, C) indicate transcript foci from  
 960 the two alleles of *TLR7* or *TLR8*. In (B, D), the two genes are transcribed only from the Xi  
 961 (arrowheads). The *TLR7* or *TLR8* hybridization pattern is schematized to the right of each row.  
 962 (E-H) Quantification of the escape from XCI for *TLR7* and *TLR8* from monocytes (E, F) and  
 963 CD4<sup>+</sup> T cells (G, H) The forest plots show the percentage of XCI escape in monocytes or T  
 964 cells and its 95% confidence interval (CI) in individual female donors (n = 6); the red diamond  
 965 denotes the meta-analytical group mean and 95% CI. (I, J) Confocal microscopy planes of cell  
 966 nuclei after RNA FISH with *TLR7* (I, pink), *TLR8* (J, red), and *XIST* (green, painting the Xi)  
 967 probes. Nuclei are counterstained with DAPI (blue). The *TLR7* and *TLR8* transcriptional foci  
 968 adjacent to the Xi territory confirm that both genes evade XCI.

969

970  
971  
972  
973

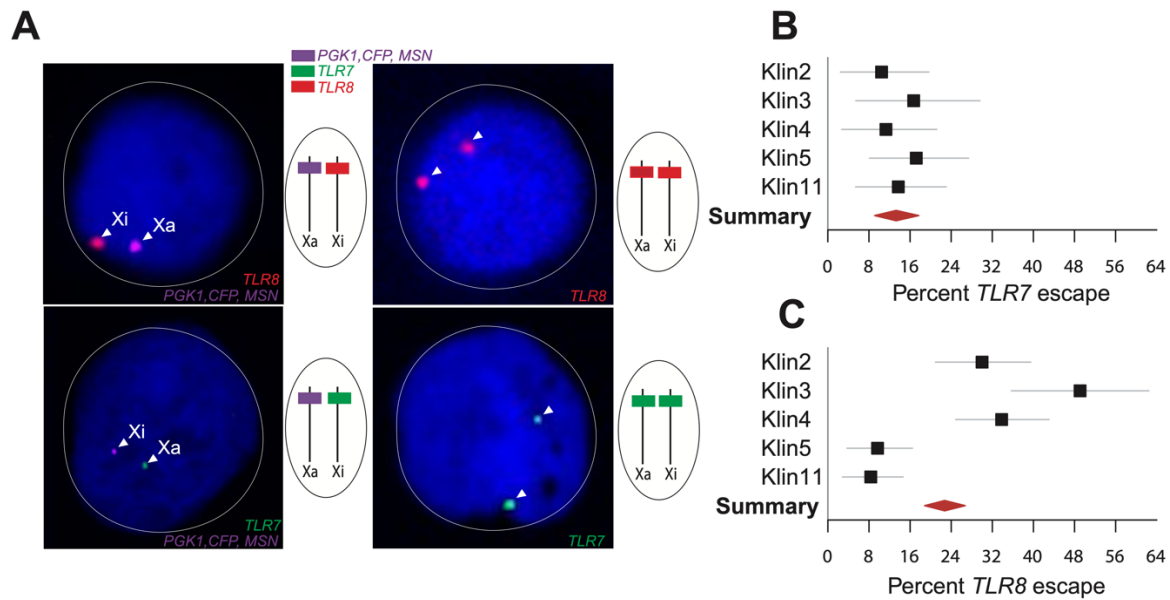

974

975 **Figure 3. *TLR7* and *TLR8* evade X chromosome inactivation in the monocytes of men with**  
 976 **Klinefelter syndrome.** (A) RNA FISH analysis of CD14<sup>+</sup> monocytes from men with KS  
 977 (47,XXY). Confocal microscopy planes of cell nuclei hybridized with fluorescent probes for  
 978 transcripts arising from *TLR8* (red), *TLR7* (green), and the Xa marker genes (pink). Nuclei are  
 979 counterstained with DAPI (blue). The arrow heads indicate *TLR8* (top) or *TLR7* (bottom)  
 980 transcript foci occurring either on both X chromosomes (right) or on the Xi only (left). (B, C)  
 981 Quantification of XCI escape for *TLR7* and *TLR8*. The forest plots show the percentage of XCI  
 982 escape and its 95% CI in KS men (n = 5). The meta-analytical group mean and 95% CI is  
 983 denoted by the red diamond.

984

985

986

987

988

989

990



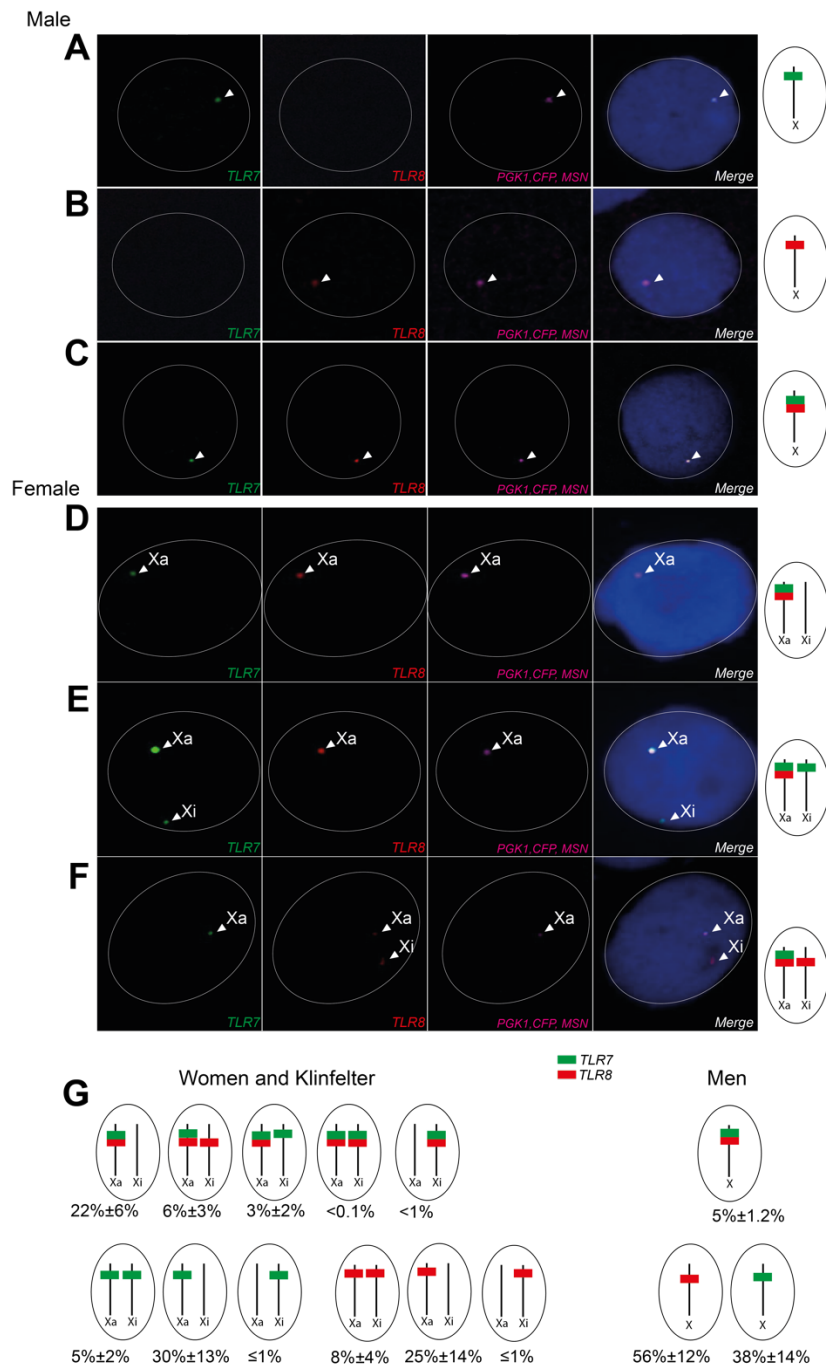

991

992 **Figure 4. Examples of *TLR7* and *TLR8* combined transcription profiles in euploid male**  
 993 **and female monocytes.** RNA FISH analysis of CD14<sup>+</sup> monocytes from male (A–C) and female  
 994 (D–F) donors. Confocal microscopy planes of cell nuclei after RNA FISH for *TLR7* (green),  
 995 *TLR8* (red), and the Xa marker (pink). Nuclei are counterstained with DAPI (blue). (A, B)  
 996 Detection of *TLR7* or *TLR8* transcripts from the single X of male cells. (C, D) Simultaneous  
 997 transcription of *TLR7* and *TLR8* on the male X or on the female Xa. (E, F) *TLR7* and *TLR8* co-  
 998 transcription on the female Xa with concomitant *TLR7* (E) or *TLR8* (F) transcriptional activity  
 999 on the Xi. (G) Schemes of the different patterns of *TLR7* and *TLR8* transcription in our RNA  
 1000 FISH data. The percentages of nuclei (mean ± SD) in females (n=6) and males (n=7) for each  
 1001 RNA FISH profile are shown.

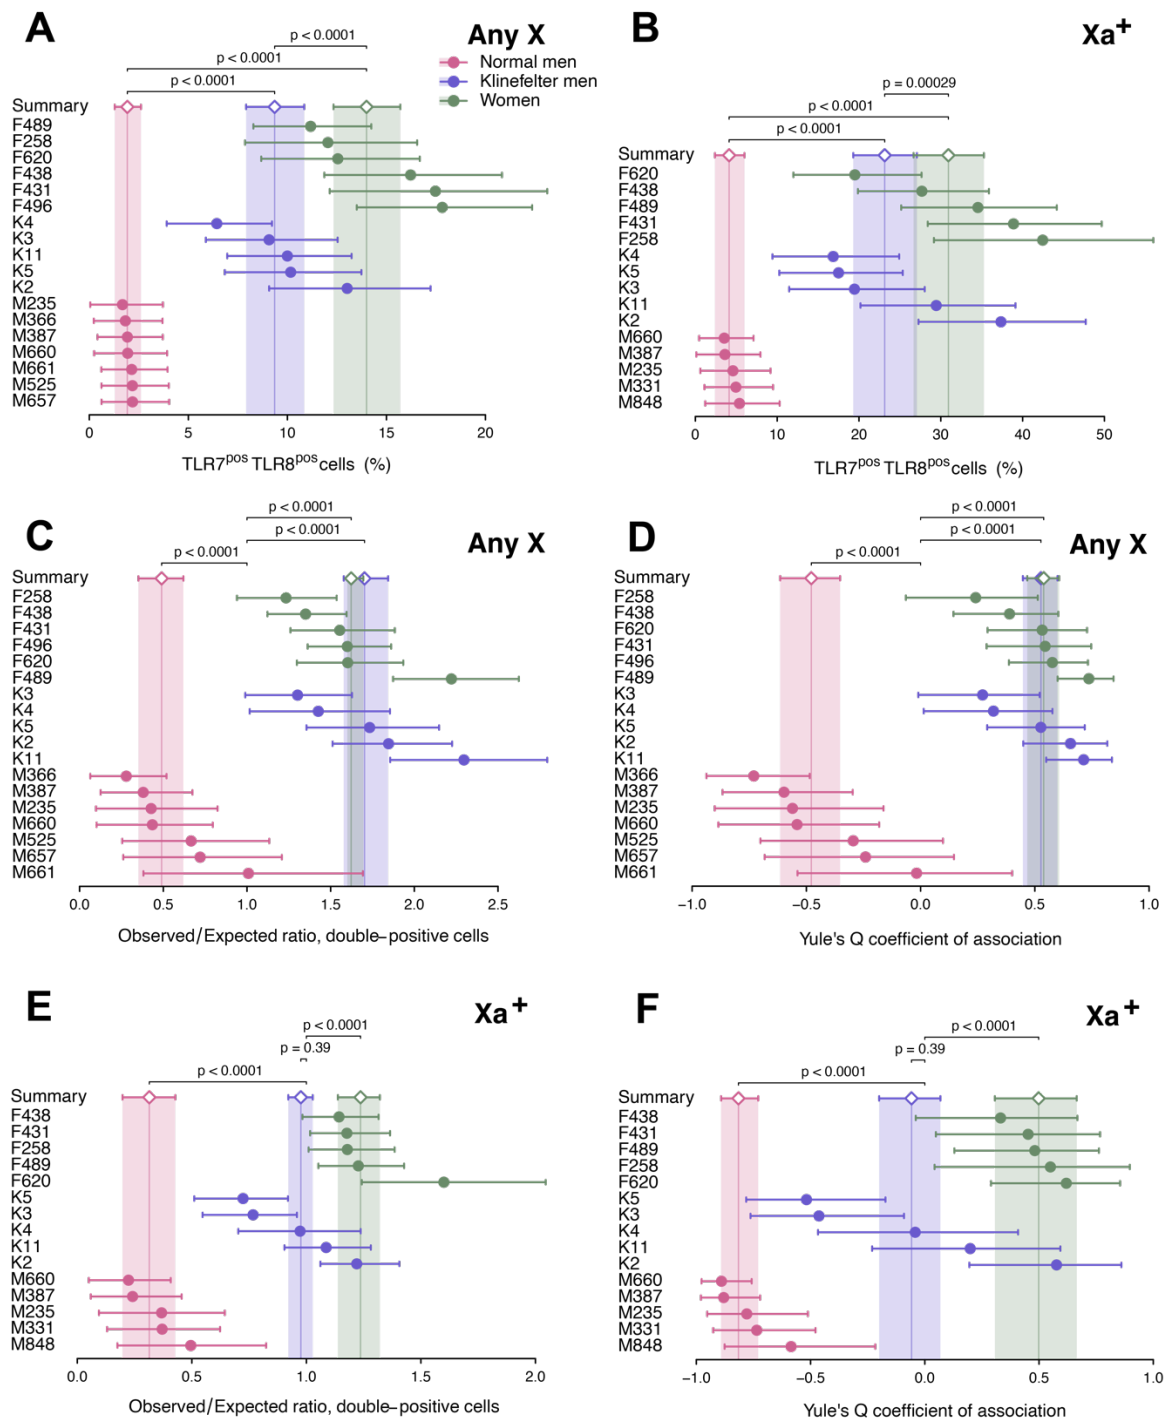

1002

1003 **Figure 5. *TLR7* and *TLR8* are transcriptionally non-independent in monocytes.**  
 1004 Quantitative analysis of RNA FISH experiments on monocytes from XX women, XY men, and  
 1005 XXY KS men. For each donor, individual cells were scored positive or negative for *TLR7* and  
 1006 for *TLR8* transcripts, and cell counts accordingly cross-classified as a 2×2 contingency table.  
 1007 Descriptive and analytical statistics were computed from each table (S3 Data), and summarized  
 1008 group-wise by meta-analysis. The forest plots display the statistics of interest for each donor  
 1009 and its 95% CI (dots and whiskers), and the meta-analytical group means (diamonds) and their  
 1010 95% CIs (whiskers and shaded areas). In panels (A, C and E), cells were scored regardless of  
 1011 the chromosome of origin of the *TLR7* and *TLR8* transcripts (Any X). In (B, D and F), only  
 1012 cells positive for the Xa probe (Xa<sup>+</sup>) were counted, and the data is restricted to *TLR7* and *TLR8*

1013 signals observed on  $Xa^+$  male or female X chromosomes. **(A, B)** Percentage of cells positive  
1014 for both *TLR7* and *TLR8* transcripts. **(C, D)** Analysis for the *obs/exp* ratio of the observed  
1015 number of double-positive cells to the number of cells in this category expected under the  
1016 hypothesis of independent transcription of *TLR7* and *TLR8*. **(E, F)** Analysis for Yule's Q  
1017 coefficient of association in  $2 \times 2$  tables. The p-values in **(A, B)** test the differences between  
1018 group means; in **C, D, E** and **F**, each p-value tests the divergence of a group summary value  
1019 relative to the critical value, *obs/exp* = 1 or Q = 0; the two-tailed p-values were derived from  
1020 the group CDs in the meta-analytical summarization. Women and XY men display significant  
1021 deviations from Q = 0, of opposite signs, signifying transcriptional non-independence of *TLR7*  
1022 and *TLR8*.

1023

1024

1025

1026

1027

1028

1029

1030

1031

1032

1033

1034

1035

1036

1037

1038

1039

1040

1041

1042

1043

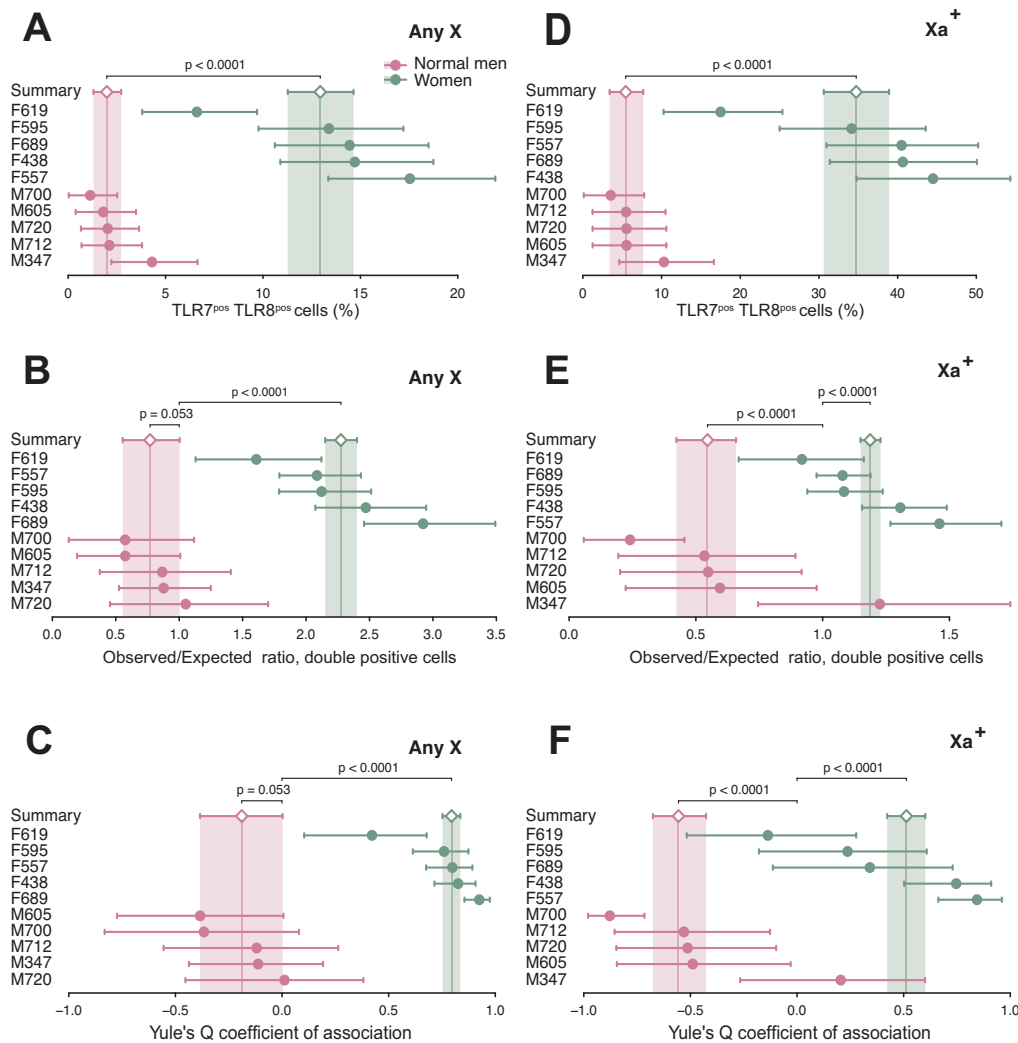

1044

1045 **Figure 6. *TLR7* and *TLR8* are transcriptionally non-independent in CD4<sup>+</sup> T cells.**  
 1046 Quantitative analysis of RNA FISH experiments on stimulated CD4<sup>+</sup> T cells from women and  
 1047 XY men. Cell counts from RNA FISH experiments were processed as in Fig 4. The forest plots  
 1048 display the statistic of interest for each donor and its 95% CI (dots and whiskers), together with  
 1049 the meta-analytical group means (diamonds) and their 95% CIs (whiskers and shaded areas). In  
 1050 (A–C), T cells were scored regardless of the chromosome of origin of the *TLR7* and *TLR8*  
 1051 transcripts (Any X). In (D–F), only cells positive for the Xa probe (Xa<sup>+</sup>) were counted, and the  
 1052 data is restricted to *TLR7* and *TLR8* signals observed on those Xa<sup>+</sup> male or female  
 1053 chromosomes. (A, D) Percentage of T cells positive for both *TLR7* and *TLR8* transcripts. (B,  
 1054 E) Analysis for the *obs/exp* ratio of the observed number of double-positive cells to the number  
 1055 of cells in this category expected under the hypothesis of independent transcription of *TLR7*  
 1056 and *TLR8*. (C, F) Analysis for Yule's Q coefficient of association in 2×2 tables. The p-values  
 1057 in (A, D) test the differences between group means; in (B, C, E, and F), each p-value tests the  
 1058 divergence of a group summary value relative to the critical value, *obs/exp* = 1 or Q = 0; the  
 1059 two-tailed p-values were derived from the group CDs in the meta-analytical summarization.  
 1060 Women and euploid men display deviations of opposite signs from Q = 0, signifying  
 1061 transcriptional non-independence of *TLR7* and *TLR8*.

1062

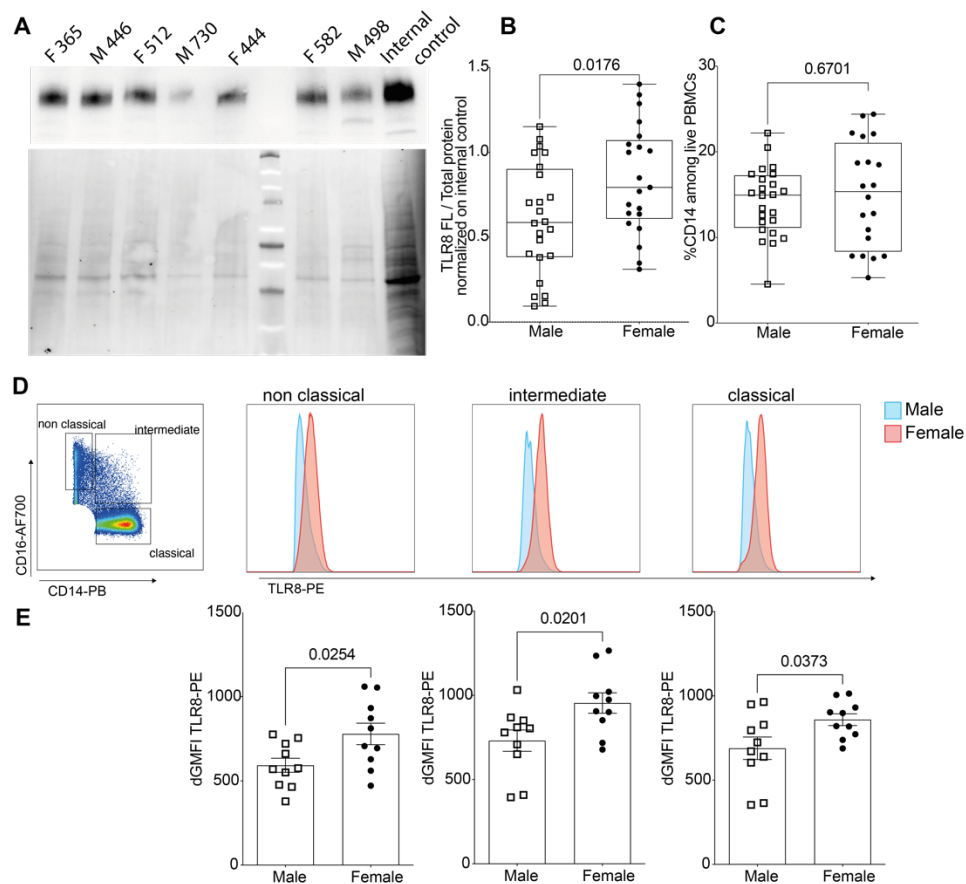

1063

1064 **Figure 7. TLR8 protein is expressed at higher level in female than in male immune cells.**

1065 (A) Western blot analysis of TLR8 expression (upper panel) and total protein staining as control  
 1066 (lower panel). (B) Densitometric signals from the full-length (120-kDa) form of TLR8 were  
 1067 normalized to total protein and then to an internal standard PBMC lysate that was loaded in  
 1068 each gel for inter-gel data normalization. Results for male (n = 24) and female (n = 21) donors  
 1069 are shown, and data were pooled from four independent experiments. (C) Cytometrically-  
 1070 determined frequency of CD14<sup>+</sup> monocytes among PBMCs from the same donors. (D) Classical  
 1071 monocytes were defined as Lin<sup>-</sup> CD14<sup>+</sup> CD16<sup>-</sup>, intermediate Lin<sup>-</sup> CD14<sup>+</sup> CD16<sup>+</sup> and non-  
 1072 classical Lin<sup>-</sup> CD14<sup>-</sup> CD16<sup>+</sup> cells as shown in Supplementary Fig S8A. TLR8 expression was  
 1073 measured by intracellular co-staining with anti-TLR8-PE and anti-TLR8-APC antibodies as  
 1074 shown in Fig S8A. (D,E) Anti-TLR8-PE staining intensity, gated on double TLR8-positive  
 1075 cells was calculated and expressed as ΔGMFI with background staining subtracted. (D)  
 1076 Representative histogram profiles from male and female donors are shown. (E) Data from  
 1077 individual male (n = 10) and female (n = 10) donors were pooled from two independent  
 1078 experiments. Statistical differences between groups were analyzed using the Mann and Whitney  
 1079 test; actual p-values are shown.

1080

1081

1082
